# Supplementary material for: Enhanced detection of RNA modifications and read mapping with high-accuracy nanopore RNA basecalling models
Source: HighWire-hosted journal article supplement (doi:10.1101/gr.278849.123), 2024-09-13
Supplement: Supplemental_Table_S1.xlsx [file Supplemental_Table_S1.xlsx]

## Sheet: Table S1
Table S1. RNA basecalling models
	DEFAULT	IVT	SUP
Software used for model training	taiyaki	taiyaki	bonito
Alternative model name	rna_r9.4.1_70bps_hac	rna_r9.4.1_70bps_ivt_hac	rna_r9.4.1_70bps_sup
Training set	not disclosed	nanopore-wgs-consortium	PRJEB40872
Num. Reads used for training	not disclosed	16246	158413
Model type	flip-flop	flip-flop	CRF-CTC
Model size [parameters in millions]	1.98532	1.98532	27
Median % identity to reference (human)	91.4	88.2	97
Distribution	guppy v6.0.6	This work	This work
Basecaller support	All guppy versions	All guppy versions	Guppy v5 and later
