# Supplementary material for: Enhanced detection of RNA modifications and read mapping with high-accuracy nanopore RNA basecalling models
Source: HighWire-hosted journal article supplement (doi:10.1101/gr.278849.123), 2024-09-13
Supplement: Supplemental_Table_S2.xlsx [file Supplemental_Table_S2.xlsx]

## Sheet: Table S2
Table S2. Fast5 files used in this study
	Sample Name	Sample Description	Selection	Replicate	Publication	Database	Data Accesion	Sample Accession
SYNTHETIC (curlcakes, UNM-S, eGFP-vaccine)	Curlcake_Unm	curlcakes1-4, fully unmodified	p(A)+	rep1	Liu et al., Nat. Commun., 2019	SRA	PRJNA511582	SAMN10640338
	Curlcakes_m6A	curlcakes1-4, fully m6A modified	p(A)+	rep1	Liu et al., Nat. Commun., 2019	SRA	PRJNA511582	SAMN10640337
	Curlcakes_pU	curlcakes1-4, fully Ψ modified	p(A)+	rep1	Begik* and Lucas* et al., Nat. Biotechnol., 2021	SRA	PRJNA549001	SAMN12061293
	Curlcake_m5C	curlcakes1-4, fully m5C modified	p(A)+	rep1	Begik* and Lucas* et al., Nat. Biotechnol., 2021	SRA	PRJNA563591	SAMN12684060
	Curlcake 5hmC	curlcakes1-4, fully hm5C modified	p(A)+	rep1	Begik* and Lucas* et al., Nat. Biotechnol., 2021	SRA	PRJNA548268	SAMN12015795
	Curlcake_m5U	curlcakes1-4, fully m5U modified	p(A)+	rep1	This work	ENA	PRJEB67632	ERS16497411
	Curlcake_ac4C	curlcakes1-4, fully ac4C modified	p(A)+	rep1	This work	ENA	PRJEB67632	ERS16497412
	Curlcake_m1Y	curlcakes1-4, fully m1Ψ modified	p(A)+	rep1	This work	ENA	PRJEB67632	ERS16497413
	Curlcake_m6A_stoich	curlcakes1-4; bc1 = 12,5% m6A, bc2 = 75% m6A, bc3 = 50% m6A, bc4 = 25% m6A	p(A)+	rep1	Cruciani*, Delgado-Tejedor* and Pryszcz* et al., bioRxiv, 2023	ENA	PRJEB61874	ERS15535289 = bc1 (12.5%); ERS15535287 = bc4 (25%); ERS15535288 = bc3 (50%); ERS15535289 = bc2 (75%)
	UNM-S	B. subtilis guanine riboswitch, B. subtilis lysine riboswitch and Tetrahymena ribozyme, fully unmodified	p(A)+	rep1	Begik* and Lucas* et al., Nat. Biotechnol., 2021	SRA	PRJNA575545	SAMN12900250
	UNM-S	B. subtilis guanine riboswitch, B. subtilis lysine riboswitch and Tetrahymena ribozyme, fully unmodified	p(A)+	rep2	This work	ENA	PRJEB67632	ERS16497414
	UNM-S	B. subtilis guanine riboswitch, B. subtilis lysine riboswitch and Tetrahymena ribozyme, fully unmodified	p(A)+	rep3	This work	ENA	PRJEB67632	ERS16497415
	eGFP_vaccine_U	synthetic RNA vaccine with eGFP CDS, fully unmodified	p(A)+	rep1	Gunter et al., Nat. Commun., 2023	SRA	PRJNA856796	SRR22888949
	eGFP_vaccine_m1Ψ	synthetic RNA vaccine with eGFP CDS, fully m1Ψ modified	p(A)+	rep1	Gunter et al., Nat. Commun., 2023	SRA	PRJNA856796	SRR22888950
IN VIVO (H. sapiens, M. musculus, X. laevis, S. cerevisiae, A. thaliana)	HEK293T_wt	HEK293T wildtype cells	p(A)+	rep1	Pratanwanich et al., Nat. Biotechnol., 2021	ENA	PRJEB40872	SAMEA7458295
	HEK293T_wt	HEK293T wildtype cells	p(A)+	rep2	Pratanwanich et al., Nat. Biotechnol., 2021	ENA	PRJEB40872	SAMEA7700689
	HEK293T_wt	HEK293T wildtype cells	p(A)+	rep3	Pratanwanich et al., Nat. Biotechnol., 2021	ENA	PRJEB40872	SAMEA7458297
	HEK293T_Mettl3_KO	HEK293T Mettl3-/- cells	p(A)+	rep1	Pratanwanich et al., Nat. Biotechnol., 2021	ENA	PRJEB40872	SAMEA7458292
	HEK293T_Mettl3_KO	HEK293T Mettl3-/- cells	p(A)+	rep2	Pratanwanich et al., Nat. Biotechnol., 2021	ENA	PRJEB40872	SAMEA7458293
	HEK293T_Mettl3_KO	HEK293T Mettl3-/- cells	p(A)+	rep3	Pratanwanich et al., Nat. Biotechnol., 2021	ENA	PRJEB40872	SAMEA7458294
	m.musculus	M. musculus brain	p(A)+	rep1	Nguyen et al., Nat. Methods, 2022	SRA	SRP363295	SRR16996275
	x.laevis	X. laevis embryo	p(A)+	rep1	Nguyen et al., Nat. Methods, 2022	SRA	SRP363295	SRR18307965
	s.cerevisiae	S. cerevisiae (Sk1)	p(A)+	rep1	Liu et al., Nat. Commun., 2019	SRA	PRJNA521324	SAMN10883273
	a.thaliana	a. thaliana	p(A)+	rep1	Parker et al., Elife, 2022	ENA	PRJEB32782	SAMEA5739397
