# Supplementary material for: Enhanced detection of RNA modifications and read mapping with high-accuracy nanopore RNA basecalling models
Source: HighWire-hosted journal article supplement (doi:10.1101/gr.278849.123), 2024-09-13
Supplement: Supplemental_Table_S3.xlsx [file Supplemental_Table_S3.xlsx]

## Sheet: Table S3
Table S3. Fastq files generated by this study and associated processed files
	Sample-ID	Sample Description	Replicate	basecalling model (short)	processed file #1	processed file #2	processed file #3	processed file #4	GEO Accesion	Sample Accession
SYNTHETIC (RNA modification benchmarking)	Curlcake_Unm_rep1_default	Curlcake_Unm	rep1	default	Curlcake_Unm_rep1_default_per_position.csv				GSE246151	GSM7863651
	Curlcake_Unm_rep1_ivt			ivt	Curlcake_Unm_rep1_ivt_per_position.csv				GSE246151	GSM7863652
	Curlcake_Unm_rep1_sup			sup	Curlcake_Unm_rep1_sup_per_position.csv				GSE246151	GSM7863653
	Curlcake_m6A_rep1_default	Curlcake_m6A	rep1	default	Curlcake_m6A_rep1_default_per_position.csv				GSE246151	GSM7863654
	Curlcake_m6A_rep1_ivt			ivt	Curlcake_m6A_rep1_ivt_per_position.csv				GSE246151	GSM7863655
	Curlcake_m6A_rep1_sup			sup	Curlcake_m6A_rep1_sup_per_position.csv				GSE246151	GSM7863656
	Curlcake_pU_rep1_default	Curlcake_pU	rep1	default	Curlcake_pU_rep1_default_per_position.csv				GSE246151	GSM7863657
	Curlcake_pU_rep1_ivt			ivt	Curlcake_pU_rep1_ivt_per_position.csv				GSE246151	GSM7863658
	Curlcake_pU_rep1_sup			sup	Curlcake_pU_rep1_sup_per_position.csv				GSE246151	GSM7863659
	Curlcake_m5C_rep1_default	Curlcake_m5C	rep1	default	Curlcake_m5C_rep1_default_per_position.csv				GSE246151	GSM7863660
	Curlcake_m5C_rep1_ivt			ivt	Curlcake_m5C_rep1_ivt_per_position.csv				GSE246151	GSM7863661
	Curlcake_m5C_rep1_sup			sup	Curlcake_m5C_rep1_sup_per_position.csv				GSE246151	GSM7863662
	Curlcake_5hmC_rep1_default	Curlcake_5hmC	rep1	default	Curlcake_5hmC_rep1_default_per_position.csv				GSE246151	GSM7863663
	Curlcake_5hmC_rep1_ivt			ivt	Curlcake_5hmC_rep1_ivt_per_position.csv				GSE246151	GSM7863664
	Curlcake_5hmC_rep1_sup			sup	Curlcake_5hmC_rep1_sup_per_position.csv				GSE246151	GSM7863665
	Curlcake_m5U_rep1_default	Curlcake_m5U	rep1	default	Curlcake_m5U_rep1_default_per_position.csv				GSE246151	GSM7863666
	Curlcake_m5U_rep1_ivt			ivt	Curlcake_m5U_rep1_ivt_per_position.csv				GSE246151	GSM7863667
	Curlcake_m5U_rep1_sup			sup	Curlcake_m5U_rep1_sup_per_position.csv				GSE246151	GSM7863668
	Curlcake_ac4C_rep1_default	Curlcake_ac4C	rep1	default	Curlcake_ac4C_rep1_default_per_position.csv				GSE246151	GSM7863669
	Curlcake_ac4C_rep1_ivt			ivt	Curlcake_ac4C_rep1_ivt_per_position.csv				GSE246151	GSM7863670
	Curlcake_ac4C_rep1_sup			sup	Curlcake_ac4C_rep1_sup_per_position.csv				GSE246151	GSM7863671
	Curlcake_m1Y_rep1_default	Curlcake_m1Y	rep1	default	Curlcake_m1Y_rep1_default_per_position.csv				GSE246151	GSM7863672
	Curlcake_m1Y_rep1_ivt			ivt	Curlcake_m1Y_rep1_ivt_per_position.csv				GSE246151	GSM7863673
	Curlcake_m1Y_rep1_sup			sup	Curlcake_m1Y_rep1_sup_per_position.csv				GSE246151	GSM7863674
	Curlcake_m6A_stoich_rep1_default	Curlcake_m6A_stoich	rep1	default	Curlcake_m6A_stoich_rep1_12.5_default_5mer.tsv	Curlcake_m6A_stoich_rep1_25_default_5mer.tsv	Curlcake_m6A_stoich_rep1_50_default_5mer.tsv	Curlcake_m6A_stoich_rep1_75_default_5mer.tsv	GSE246151	GSM7863675
	Curlcake_m6A_stoich_rep1_ivt			ivt	Curlcake_m6A_stoich_rep1_12.5_ivt_5mer.tsv	Curlcake_m6A_stoich_rep1_25_ivt_5mer.tsv	Curlcake_m6A_stoich_rep1_50_ivt_5mer.tsv	Curlcake_m6A_stoich_rep1_75_ivt_5mer.tsv	GSE246151	GSM7863676
	Curlcake_m6A_stoich_rep1_sup			sup	Curlcake_m6A_stoich_rep1_12.5_sup_5mer.tsv	Curlcake_m6A_stoich_rep1_25_sup_5mer.tsv	Curlcake_m6A_stoich_rep1_50_sup_5mer.tsv	Curlcake_m6A_stoich_rep1_75_sup_5mer.tsv	GSE246151	GSM7863677
IN VIVO (m6A analysis)	HEK293T_WT_rep1_default	HEK293T_WT	rep1	default	wt_vs_ko_default_eligos2.txt	human.tsv	readlengths_default_rep1.txt		GSE246151	GSM7863678
	HEK293T_WT_rep1_ivt			ivt	wt_vs_ko_ivt_eligos2.txt	human.tsv	readlengths_ivt_rep1.txt		GSE246151	GSM7863679
	HEK293T_WT_rep1_sup			sup	wt_vs_ko_sup_eligos2.txt	human.tsv	readlengths_sup_rep1.txt		GSE246151	GSM7863680
	HEK293T_WT_rep2_default	HEK293T_WT	rep2	default	wt_vs_ko_default_eligos2.txt		readlengths_default_rep2.txt		GSE246151	GSM7863681
	HEK293T_WT_rep2_ivt			ivt	wt_vs_ko_ivt_eligos2.txt		readlengths_ivt_rep2.txt		GSE246151	GSM7863682
	HEK293T_WT_rep2_sup			sup	wt_vs_ko_sup_eligos2.txt		readlengths_sup_rep2.txt		GSE246151	GSM7863683
	HEK293T_WT_rep3_default	HEK293T_WT	rep3	default	wt_vs_ko_default_eligos2.txt		readlengths_default_rep3.txt		GSE246151	GSM7863684
	HEK293T_WT_rep3_ivt			ivt	wt_vs_ko_ivt_eligos2.txt		readlengths_ivt_rep3.txt		GSE246151	GSM7863685
	HEK293T_WT_rep3_sup			sup	wt_vs_ko_sup_eligos2.txt		readlengths_sup_rep3.txt		GSE246151	GSM7863686
	HEK293T_Mettl3_KO_rep1_default	HEK293T_Mettl3_KO	rep1	default	wt_vs_ko_default_eligos2.txt				GSE246151	GSM7863687
	HEK293T_Mettl3_KO_rep1_ivt			ivt	wt_vs_ko_ivt_eligos2.txt				GSE246151	GSM7863688
	HEK293T_Mettl3_KO_rep1_sup			sup	wt_vs_ko_sup_eligos2.txt				GSE246151	GSM7863689
	HEK293T_Mettl3_KO_rep2_default	HEK293T_Mettl3_KO	rep2	default	wt_vs_ko_default_eligos2.txt				GSE246151	GSM7863690
	HEK293T_Mettl3_KO_rep2_ivt			ivt	wt_vs_ko_ivt_eligos2.txt				GSE246151	GSM7863691
	HEK293T_Mettl3_KO_rep2_sup			sup	wt_vs_ko_sup_eligos2.txt				GSE246151	GSM7863692
	HEK293T_Mettl3_KO_rep3_default	HEK293T_Mettl3_KO	rep3	default	wt_vs_ko_default_eligos2.txt				GSE246151	GSM7863693
	HEK293T_Mettl3_KO_rep3_ivt			ivt	wt_vs_ko_ivt_eligos2.txt				GSE246151	GSM7863694
	HEK293T_Mettl3_KO_rep3_sup			sup	wt_vs_ko_sup_eligos2.txt				GSE246151	GSM7863695
IN VIVO (read accuracy and mapping comp.)	m.musculus_rep1_default	m.musculus	rep1	default	mouse.tsv				GSE246151	GSM7863696
	m.musculus_rep1_ivt			ivt	mouse.tsv				GSE246151	GSM7863697
	m.musculus_rep1_sup			sup	mouse.tsv				GSE246151	GSM7863698
	x.laevis_rep1_default	x.laevis	rep1	default	x_laevis.tsv				GSE246151	GSM7863699
	x.laevis_rep1_ivt			ivt	x_laevis.tsv				GSE246151	GSM7863700
	x.laevis_rep1_sup			sup	x_laevis.tsv				GSE246151	GSM7863701
	s.cerevisiae_rep1_default	s.cerevisiae	rep1	default	yeast.tsv				GSE246151	GSM7863702
	s.cerevisiae_rep1_ivt			ivt	yeast.tsv				GSE246151	GSM7863703
	s.cerevisiae_rep1_sup			sup	yeast.tsv				GSE246151	GSM7863704
	a.thaliana_rep1_default	a.thaliana	rep1	default	a_thaliana.tsv				GSE246151	GSM7863705
	a.thaliana_rep1_ivt			ivt	a_thaliana.tsv				GSE246151	GSM7863706
	a.thaliana_rep1_sup			sup	a_thaliana.tsv				GSE246151	GSM7863707
SYNTHETIC (mapping comp.)	UNM-S_rep1_default	UNM-S	rep1	default	readlengths_UNM-S_rep1_default.txt				GSE246151	GSM7863708
	UNM-S_rep1_ivt			ivt	readlengths_UNM-S_rep1_ivt.txt				GSE246151	GSM7863709
	UNM-S_rep1_sup			sup	readlengths_UNM-S_rep1_sup.txt				GSE246151	GSM7863710
	UNM-S_rep2_default	UNM-S	rep2	default	readlengths_UNM-S_rep2_default.txt				GSE246151	GSM7863711
	UNM-S_rep2_ivt			ivt	readlengths_UNM-S_rep2_ivt.txt				GSE246151	GSM7863712
	UNM-S_rep2_sup			sup	readlengths_UNM-S_rep2_sup.txt				GSE246151	GSM7863713
	UNM-S_rep3_default	UNM-S	rep3	default	readlengths_UNM-S_rep3_default.txt				GSE246151	GSM7863714
	UNM-S_rep3_ivt			ivt	readlengths_UNM-S_rep3_ivt.txt				GSE246151	GSM7863715
	UNM-S_rep3_sup			sup	readlengths_UNM-S_rep3_sup.txt				GSE246151	GSM7863716
SYNTHETIC (eGFP vaccine)	eGFP_vaccine_U_rep1_default	eGFP_vaccine_U	rep1	default	eGFP_vaccine_U_rep1_default.csv				GSE246151	GSM7863717
	eGFP_vaccine_U_rep1_sup			sup	eGFP_vaccine_U_rep1_sup.csv				GSE246151	GSM7863718
	eGFP_vaccine_m1Y_rep1_default	eGFP_vaccine_m1Ψ	rep2	default	eGFP_vaccine_m1Y_rep1_default.csv				GSE246151	GSM7863719
	eGFP_vaccine_m1Y_rep1_sup			sup	eGFP_vaccine_m1Y_rep1_sup.csv				GSE246151	GSM7863720
