# Supplementary material for: Enhanced detection of RNA modifications and read mapping with high-accuracy nanopore RNA basecalling models
Source: HighWire-hosted journal article supplement (doi:10.1101/gr.278849.123), 2024-09-13
Supplement: Supplemental_Table_S4.xlsx [file Supplemental_Table_S4.xlsx]

## Sheet: Table S4
Table S4. Predicted overlap of m6A sites found in HEK293T cells for tested methods/basecalling models
chr	pos	strand	default	ivt	sup	GLORI-seq	miCLIP	m6ACE-seq
X	304775	-	1	0	0	0	0	0
X	304777	-	1	0	0	1	0	0
X	1386347	-	1	0	0	1	0	1
X	1386349	-	1	0	0	0	0	0
X	1386525	-	1	0	0	1	0	1
X	1389362	-	1	0	0	0	0	1
X	1389407	-	1	0	0	1	0	0
X	1389527	-	1	0	0	1	0	1
X	1389671	-	1	0	0	1	0	1
X	1601460	+	1	0	0	0	0	0
X	1601461	+	1	0	0	0	0	0
X	1601882	+	1	0	0	0	0	0
X	13708930	+	1	0	0	1	0	1
X	13708987	+	1	0	0	1	0	0
X	20128191	-	1	0	0	0	0	0
X	24077498	+	1	0	0	0	0	0
X	24077500	+	1	0	0	1	0	0
X	38805031	+	1	0	0	1	0	1
X	38805202	+	1	0	0	1	0	1
X	38805319	+	1	0	0	1	0	1
X	38805331	+	1	0	0	1	0	1
X	38805600	+	1	0	0	0	0	0
X	38805757	+	1	0	0	1	0	0
X	40052021	-	1	0	0	0	0	0
X	40052175	-	1	0	0	0	0	0
X	41347782	+	1	0	0	0	0	0
X	44524078	-	1	0	0	0	0	0
X	47636733	-	1	0	0	1	0	0
X	47639255	-	1	0	0	1	0	1
X	48523819	+	1	0	0	0	0	0
X	48560266	+	1	0	0	0	0	0
X	48560472	+	1	0	0	0	0	0
X	48577802	+	1	0	0	1	0	0
X	48700199	+	1	0	0	1	0	1
X	48904946	-	1	0	0	1	0	1
X	49071743	-	1	0	0	1	0	0
X	49074625	-	1	0	0	0	0	0
X	49074799	-	1	0	0	1	0	0
X	51491548	-	1	0	0	0	0	0
X	51896842	+	1	0	0	0	0	0
X	52067146	-	1	0	0	0	0	0
X	53547945	-	1	0	0	0	0	0
X	53548150	-	1	0	0	0	0	0
X	54810976	+	1	0	0	1	0	0
X	55006727	+	1	0	0	1	0	0
X	55006974	+	1	0	0	0	0	0
X	55007315	+	1	0	0	1	0	1
X	55007453	+	1	0	0	1	0	0
X	70134653	+	1	0	0	0	0	0
X	70134724	+	1	0	0	0	0	0
X	71060903	-	1	0	0	0	0	0
X	71300117	+	1	0	0	1	0	1
X	71573965	+	1	0	0	1	0	0
X	72301930	-	1	0	0	1	0	0
X	101346380	-	1	0	0	0	0	0
X	101346382	-	1	0	0	1	0	0
X	101346502	-	1	0	0	1	0	1
X	101412208	+	1	0	0	1	0	1
X	101412224	+	1	0	0	1	0	1
X	101615422	-	1	0	0	0	0	1
X	103253667	-	1	0	0	1	0	0
X	103253669	-	1	0	0	0	0	0
X	103253670	-	1	0	0	0	0	0
X	103253671	-	1	0	0	0	0	0
X	103253767	-	1	0	0	1	0	1
X	103253786	-	1	0	0	0	0	0
X	103253788	-	1	0	0	1	0	1
X	103587135	+	1	0	0	1	0	0
X	103630145	+	1	0	0	1	0	0
X	103630262	+	1	0	0	1	0	1
X	103676614	-	1	0	0	1	0	0
X	103676620	-	1	0	0	1	0	1
X	107714039	-	1	0	0	1	0	0
X	107714117	-	1	0	0	1	0	0
X	107714143	-	1	0	0	0	0	0
X	107714145	-	1	0	0	1	0	1
X	107714376	-	1	0	0	0	0	0
X	107714378	-	1	0	0	1	0	0
X	107714483	-	1	0	0	1	0	1
X	107714484	-	1	0	0	0	0	0
X	108732807	-	1	0	0	0	0	0
X	108732808	-	1	0	0	0	0	0
X	112779154	-	1	0	0	0	0	0
X	115649668	+	1	0	0	1	0	0
X	119243725	+	1	0	0	0	0	0
X	119243726	+	1	0	0	0	0	0
X	119469713	+	1	0	0	0	0	0
X	119469715	+	1	0	0	1	0	1
X	119469859	+	1	0	0	1	0	1
X	119469866	+	1	0	0	0	0	0
X	119471245	+	1	0	0	1	0	0
X	119588534	-	1	0	0	1	0	0
X	119589557	-	1	0	0	1	0	0
X	119590412	-	1	0	0	1	0	0
X	119591119	-	1	0	0	0	0	0
X	119871245	-	1	0	0	1	0	1
X	120626388	-	1	0	0	1	0	0
X	120626895	-	1	0	0	1	0	0
X	129806006	-	1	0	0	1	0	0
X	135021671	-	1	0	0	0	0	0
X	135033090	+	1	0	0	0	0	0
X	135033168	+	1	0	0	0	0	0
X	135033192	+	1	0	0	1	0	0
X	135033231	+	1	0	0	1	0	0
X	135033379	+	1	0	0	1	0	0
X	135051101	-	1	0	0	1	0	0
X	135051182	-	1	0	0	1	0	0
X	135051260	-	1	0	0	1	0	1
X	135051273	-	1	0	0	1	0	1
X	135051321	-	1	0	0	1	0	1
X	135051323	-	1	0	0	0	0	0
X	135051325	-	1	0	0	0	0	1
X	135051773	-	1	0	0	1	0	0
X	136209907	+	1	0	0	1	0	1
X	136874122	-	1	0	0	0	0	1
X	149546848	+	1	0	0	0	0	1
X	149929937	-	1	0	0	0	0	0
X	149932656	-	1	0	0	1	0	0
X	150764538	+	1	0	0	1	0	1
X	150768607	-	1	0	0	1	0	0
X	150768958	-	1	0	0	1	0	0
X	152827738	-	1	0	0	1	0	0
X	152868822	+	1	0	0	0	0	0
X	152869119	+	1	0	0	1	0	1
X	152869284	+	1	0	0	0	0	0
X	152869286	+	1	0	0	1	0	0
X	153073202	+	1	0	0	1	0	0
X	153073729	+	1	0	0	1	0	0
X	153447691	-	1	0	0	0	0	0
X	153588024	-	1	0	0	1	0	0
X	153588026	-	1	0	0	0	0	0
X	153588081	-	1	0	0	0	0	1
X	153588133	-	1	0	0	1	0	0
X	153588256	-	1	0	0	1	0	1
X	153588309	-	1	0	0	1	0	0
X	153588380	-	1	0	0	0	0	1
X	153688378	+	1	0	0	1	0	0
X	153688752	+	1	0	0	1	0	0
X	153795748	+	1	0	0	0	0	0
X	153795976	+	1	0	0	0	0	0
X	153798488	+	1	0	0	1	0	0
X	153798498	+	1	0	0	1	0	0
X	154011461	-	1	0	0	1	0	0
X	154011585	-	1	0	0	1	0	0
X	154011587	-	1	0	0	0	0	0
X	154030448	-	1	0	0	1	0	0
X	154030521	-	1	0	0	1	0	1
X	154030634	-	1	0	0	1	0	0
X	154030822	-	1	0	0	1	0	1
X	154031375	-	1	0	0	1	0	1
X	154381379	+	1	0	0	0	0	0
X	154421179	+	1	0	0	1	0	0
X	154429049	+	1	0	0	1	0	1
X	154435963	+	1	0	0	1	0	1
X	154435996	+	1	0	0	0	0	0
X	154436149	+	1	0	0	1	0	0
X	154450585	+	1	0	0	1	0	0
X	154484190	-	1	0	0	0	0	0
X	154484192	-	1	0	0	1	0	1
X	154484493	-	1	0	0	0	0	0
X	154484495	-	1	0	0	1	0	0
X	154484582	-	1	0	0	1	0	1
X	154484644	-	1	0	0	1	0	0
X	154484699	-	1	0	0	1	0	1
X	154484726	-	1	0	0	1	0	1
X	154484792	-	1	0	0	1	0	1
X	154485159	-	1	0	0	1	0	0
X	154485570	-	1	0	0	1	0	1
X	154506287	-	1	0	0	1	0	1
X	155054861	+	1	0	0	0	0	0
X	155054863	+	1	0	0	1	0	1
X	155054865	+	1	0	0	0	0	0
X	155054866	+	1	0	0	0	0	0
X	155054946	+	1	0	0	0	0	0
X	155054947	+	1	0	0	0	0	0
13	21177287	+	1	0	0	0	0	0
13	21177326	+	1	0	0	1	0	0
13	27435621	+	1	1	0	1	1	0
13	27622956	+	1	1	0	0	0	0
13	27622958	+	1	1	0	1	1	1
13	27622968	+	1	1	0	1	0	0
13	27623101	+	1	1	0	0	0	0
13	27623103	+	1	1	0	1	1	1
13	27623206	+	1	1	0	1	1	0
13	27623273	+	1	0	0	0	0	0
13	27962444	-	1	0	0	1	0	0
13	27962960	-	1	0	0	1	1	1
13	27963006	-	1	0	0	1	1	1
13	27963050	-	1	0	0	0	0	0
13	27968779	-	1	1	0	1	0	0
13	29510032	-	1	1	0	0	0	0
13	29510396	-	1	1	0	0	0	1
13	29510422	-	1	1	0	1	0	0
13	29512180	-	1	0	0	1	0	0
13	29513893	-	1	0	0	1	0	1
13	40766892	-	1	0	0	0	1	0
13	44434386	-	1	1	0	1	0	0
13	45336883	-	1	1	0	0	1	0
13	45336989	-	1	0	0	1	0	0
13	45336992	-	1	0	0	0	0	0
13	45337045	-	1	1	0	1	1	0
13	45337260	-	1	1	0	1	1	1
13	45337293	-	1	1	0	1	1	1
13	45337309	-	1	1	0	1	1	1
13	52461757	+	1	1	0	0	0	0
13	75526541	-	1	1	0	0	1	1
13	77746596	+	1	1	0	1	1	0
13	77746720	+	1	1	0	0	0	0
13	77763373	+	1	0	0	1	1	0
13	80337114	-	1	1	0	0	0	0
13	94627322	+	1	0	0	0	0	0
13	98022053	+	1	0	0	0	0	0
13	98022055	+	1	1	0	1	1	0
13	98022376	+	1	1	0	1	1	1
13	99385482	+	1	1	0	0	0	0
13	99385483	+	1	1	0	0	0	0
13	99385485	+	1	0	0	1	1	0
13	99385761	+	1	1	0	0	0	0
13	99964869	-	1	1	0	1	0	0
13	113177977	-	1	1	0	0	0	0
13	113640315	+	1	0	0	0	0	0
13	113640696	+	1	1	0	0	0	0
13	113640697	+	1	1	0	0	0	0
9	4860423	+	1	1	0	1	1	0
9	7798439	-	1	1	0	1	0	0
9	7798441	-	1	1	0	0	0	0
9	7798442	-	1	1	0	0	0	0
9	7798468	-	1	1	0	1	1	1
9	7798484	-	1	1	0	0	0	0
9	7798486	-	1	1	0	1	1	1
9	19049843	+	1	1	0	1	1	0
9	19049963	+	1	1	0	1	1	0
9	19050158	+	1	0	0	0	0	0
9	19050226	+	1	0	0	0	0	0
9	25677473	-	1	1	0	1	1	1
9	25677890	-	1	0	0	1	1	1
9	33038962	+	1	1	0	1	1	0
9	33462206	-	1	0	0	1	0	0
9	33462626	-	1	0	0	1	1	1
9	33817714	+	1	1	0	1	0	0
9	33917406	+	1	1	0	1	1	0
9	33917834	+	1	1	0	1	0	0
9	33917924	+	1	1	0	0	0	0
9	34241591	+	1	1	0	1	0	0
9	34241839	+	1	0	0	1	1	1
9	34343409	+	1	1	0	1	1	0
9	34521229	-	1	1	0	1	1	0
9	34610730	-	1	1	0	1	1	1
9	34610916	-	1	1	0	1	0	0
9	34610925	-	1	1	0	1	0	1
9	34611015	-	1	1	0	1	1	1
9	34611022	-	1	1	0	1	1	0
9	34611024	-	1	1	0	0	0	0
9	34635467	-	1	1	0	1	0	0
9	34635638	-	1	0	0	1	1	1
9	34635719	-	1	1	0	1	1	1
9	35056586	-	1	1	0	1	1	0
9	35057077	-	1	1	0	1	1	1
9	35073995	-	1	0	0	1	1	0
9	35609393	+	1	1	0	1	0	0
9	35609785	+	1	1	0	1	1	1
9	35660963	+	1	1	0	1	0	1
9	35661040	+	1	1	0	1	0	1
9	35661042	+	1	1	0	0	0	0
9	35697752	-	1	1	0	1	1	0
9	35737070	-	1	0	0	1	0	0
9	35748531	-	1	1	0	1	1	1
9	36211870	+	1	1	0	1	0	0
9	37430583	+	1	1	0	0	0	0
9	37503387	+	1	0	0	1	1	1
9	37588787	-	1	1	0	0	0	0
9	37588789	-	1	1	0	1	1	1
9	37588802	-	1	1	0	1	1	1
9	37588804	-	1	0	0	0	0	0
9	37919781	-	1	1	0	1	0	1
9	68780789	+	1	0	0	0	0	0
9	69072782	+	1	1	0	1	0	0
9	69072882	+	1	0	0	1	0	0
9	72355367	-	1	0	0	0	0	0
9	72355368	-	1	0	0	0	0	0
9	74952345	-	1	0	0	1	1	0
9	74952427	-	1	1	0	1	0	1
9	78329390	+	1	1	0	1	1	0
9	81689022	-	1	0	0	1	0	0
9	86027432	-	1	0	0	1	1	0
9	86265966	-	1	0	0	1	0	0
9	86945398	-	1	1	0	1	1	0
9	86945525	-	1	1	0	1	0	1
9	86945788	-	1	1	0	1	1	0
9	86945856	-	1	1	0	1	0	0
9	86945976	-	1	1	0	0	1	1
9	86946733	-	1	0	0	1	1	0
9	86946864	-	1	1	0	1	1	1
9	92032324	-	1	1	0	1	0	0
9	93121838	-	1	1	0	1	1	0
9	93121851	-	1	1	0	1	1	1
9	93121908	-	1	1	0	0	0	0
9	93121910	-	1	1	0	1	1	1
9	93446648	-	1	1	0	1	0	1
9	93451178	-	1	1	0	1	1	1
9	97910503	-	1	0	0	0	0	0
9	98015476	+	1	1	0	1	0	1
9	99218140	-	1	1	0	1	0	0
9	99218272	-	1	1	0	0	0	0
9	99218600	-	1	1	0	0	0	1
9	99218602	-	1	0	0	0	0	0
9	99218674	-	1	0	0	0	0	0
9	99230481	+	1	0	0	0	0	0
9	101390596	-	1	1	0	0	0	0
9	101475554	-	1	1	0	1	1	1
9	101475674	-	1	1	0	1	0	0
9	101476053	-	1	1	0	1	0	0
9	101476763	-	1	1	0	1	1	0
9	107329661	+	1	1	0	1	1	0
9	113291773	+	1	0	0	0	0	0
9	113373504	-	1	1	0	1	0	0
9	113373848	-	1	1	0	1	0	1
9	113373964	-	1	1	0	1	0	0
9	113373966	-	1	0	0	0	0	0
9	113373998	-	1	1	0	1	1	0
9	113374307	-	1	1	0	1	0	0
9	113408676	-	1	1	0	0	1	0
9	113408797	-	1	0	0	1	0	0
9	120787962	-	1	0	0	0	0	0
9	122144248	-	1	0	0	1	0	0
9	124353607	-	1	0	0	1	0	1
9	124857884	-	1	0	0	0	0	0
9	124876928	+	1	0	0	0	0	0
9	124876929	+	1	0	0	0	0	0
9	124876931	+	1	1	0	0	1	1
9	124876951	+	1	1	0	0	0	0
9	124876953	+	1	1	0	1	1	1
9	124877015	+	1	0	0	1	0	1
9	124877053	+	1	1	0	0	1	0
9	124877164	+	1	0	0	0	0	0
9	125236469	-	1	0	0	1	1	0
9	125236470	-	1	0	0	0	0	0
9	125236519	-	1	1	0	0	0	0
9	125236590	-	1	1	0	1	0	1
9	125236592	-	1	0	0	0	0	0
9	125236658	-	1	0	0	0	0	0
9	125236690	-	1	0	0	1	0	1
9	125236714	-	1	0	0	0	0	0
9	125239094	-	1	1	0	1	1	1
9	125239133	-	1	0	0	0	0	0
9	125239144	-	1	0	0	0	0	1
9	125239166	-	1	0	0	1	0	1
9	127407208	+	1	0	0	0	0	0
9	127714072	-	1	0	0	1	0	0
9	127789714	+	1	1	0	1	1	0
9	127867869	-	1	1	0	1	1	0
9	127867873	-	1	0	0	0	0	0
9	127908269	-	1	0	0	1	0	0
9	127908399	-	1	1	0	1	0	0
9	127935243	-	1	0	0	1	0	0
9	127935371	-	1	1	0	1	1	0
9	127935445	-	1	1	0	0	0	0
9	127935566	-	1	0	0	1	0	1
9	128163637	+	1	1	0	1	0	1
9	128309345	-	1	1	0	1	1	0
9	128309347	-	1	1	0	0	0	0
9	128309361	-	1	1	0	1	1	1
9	128309490	-	1	1	0	0	0	1
9	128309505	-	1	1	0	1	1	1
9	128309635	-	1	1	0	0	0	0
9	128309637	-	1	1	0	1	1	0
9	128309731	-	1	0	0	1	1	1
9	128333739	+	1	0	0	0	0	0
9	128333754	+	1	1	0	1	1	1
9	128333878	+	1	0	0	0	0	0
9	128360737	+	1	0	0	0	0	0
9	128360739	+	1	1	0	1	1	0
9	128633771	-	1	1	0	1	1	1
9	128633777	-	1	0	0	1	0	0
9	128720986	-	1	1	0	0	1	0
9	128730201	-	1	1	0	1	0	1
9	128808969	+	1	1	0	1	0	0
9	128818788	+	1	1	0	1	1	0
9	128822627	+	1	1	0	1	1	0
9	128822199	-	1	1	0	1	1	1
9	128822358	-	1	0	0	1	0	0
9	128917832	+	1	1	0	1	0	0
9	128946102	-	1	0	0	0	0	0
9	128946104	-	1	0	0	1	1	1
9	128947004	-	1	0	0	0	0	0
9	129634174	+	1	1	0	1	1	1
9	129635481	+	1	1	0	0	0	0
9	129637465	-	1	0	0	0	1	0
9	129637592	-	1	0	0	1	1	0
9	129638385	-	1	1	0	1	0	1
9	129814057	-	1	1	0	1	1	1
9	129814086	-	1	1	0	1	0	0
9	129814088	-	1	0	0	0	0	0
9	129822644	-	1	1	0	1	1	0
9	129822650	-	1	0	0	0	1	1
9	129827734	-	1	1	0	1	1	0
9	130233320	+	1	1	0	0	0	0
9	130703796	+	1	1	0	1	1	1
9	130703803	+	1	0	0	1	1	0
9	130703853	+	1	0	0	0	0	0
9	130703854	+	1	0	0	0	0	0
9	130703855	+	1	1	0	0	0	0
9	130703959	+	1	0	0	0	0	0
9	131495986	+	1	1	0	0	0	0
9	131495996	+	1	0	0	1	1	1
9	131496129	+	1	1	0	1	1	0
9	131497990	+	1	1	0	1	1	0
9	131499805	+	1	1	0	1	1	1
9	131524858	-	1	1	0	1	1	0
9	131524875	-	1	0	0	0	0	0
9	131524987	-	1	1	0	1	1	0
9	131525122	-	1	1	0	1	1	0
9	131579430	-	1	0	0	1	0	0
9	131860329	-	1	0	0	1	1	1
9	131860354	-	1	1	0	1	0	1
9	133030981	+	1	1	0	1	0	0
9	133058354	+	1	1	0	1	1	0
9	133098400	-	1	1	0	1	0	1
9	133098539	-	1	1	0	1	0	0
9	133331435	-	1	1	0	1	1	0
9	133331495	-	1	0	0	1	1	1
9	133331644	-	1	1	0	1	0	0
9	133331652	-	1	1	0	1	1	1
9	133331775	-	1	0	0	0	0	0
9	133331820	-	1	1	0	1	1	0
9	133331893	-	1	1	0	1	1	0
9	133362587	-	1	1	0	1	0	0
9	133363355	-	1	1	0	1	1	0
9	133363444	-	1	1	0	1	1	0
9	133363632	-	1	1	0	1	1	1
9	133363683	-	1	1	0	1	1	0
9	133406892	-	1	1	0	1	0	1
9	133414820	-	1	0	0	1	1	1
9	134157985	+	1	1	0	1	0	1
9	134158098	+	1	0	0	1	1	1
9	135488108	+	1	0	0	1	1	0
9	135503723	+	1	1	0	1	1	1
9	135503871	+	1	0	0	0	0	0
9	135503912	+	1	1	0	1	1	1
9	135503914	+	1	1	0	0	0	0
9	135504083	+	1	1	0	1	1	1
9	135504294	+	1	1	0	1	1	1
9	135504383	+	1	1	0	1	1	1
9	135933240	-	1	0	0	0	0	0
9	135933290	-	1	1	0	1	1	1
9	135933329	-	1	0	0	1	0	1
9	135933418	-	1	0	0	0	0	0
9	136115053	-	1	1	0	1	0	0
9	136115056	-	1	0	0	0	0	0
9	136116020	-	1	1	0	1	1	1
9	136116117	-	1	1	0	1	1	1
9	136116284	-	1	0	0	0	0	0
9	136116288	-	1	1	0	1	0	0
9	136116312	-	1	1	0	0	0	0
9	136116314	-	1	1	0	1	1	1
9	136116335	-	1	1	0	1	1	1
9	136407213	-	1	1	0	0	0	0
9	136407262	-	1	1	0	1	1	1
9	136407421	-	1	1	0	1	0	0
9	136423332	+	1	1	0	1	1	0
9	136423652	+	1	1	0	1	1	0
9	136673204	-	1	0	0	1	1	0
9	136673524	-	1	1	0	1	1	1
9	136673549	-	1	1	0	1	1	0
9	136723034	+	1	1	0	1	1	1
9	136723135	+	1	1	0	0	0	0
9	136723157	+	1	1	0	1	0	1
9	136723729	+	1	1	0	0	0	0
9	136723730	+	1	1	0	0	0	0
9	136723923	+	1	0	0	0	0	0
9	136723955	+	1	1	0	1	1	1
9	136723957	+	1	1	0	0	0	0
9	136723961	+	1	1	0	1	1	1
9	136724083	+	1	0	0	1	0	0
9	136840763	+	1	1	0	1	1	1
9	136840765	+	1	1	0	0	0	0
9	136840812	+	1	1	0	0	1	1
9	136862323	-	1	1	0	1	1	0
9	136940810	-	1	1	0	1	1	1
9	136940886	-	1	1	0	1	0	1
9	136940897	-	1	1	0	1	0	0
9	136942168	-	1	1	0	1	1	0
9	136942221	-	1	0	0	1	1	1
9	137108579	+	1	1	0	1	0	1
9	137175063	-	1	1	0	1	0	1
9	137204250	-	1	1	0	1	1	0
9	137204331	-	1	0	0	0	0	0
9	137204437	-	1	1	0	0	1	0
9	137204542	-	1	1	0	0	0	0
9	137204723	-	1	0	0	1	1	0
9	137204971	-	1	1	0	1	1	1
9	137218645	+	1	0	0	0	0	0
9	137242558	+	1	1	0	1	1	1
9	137242600	+	1	1	0	0	1	1
9	137242710	+	1	0	0	0	0	0
9	137243109	+	1	0	0	0	0	0
9	137243428	+	1	0	0	0	0	1
9	137243593	+	1	1	0	0	0	0
9	137273099	+	1	1	0	1	1	1
9	137273149	+	1	1	0	1	0	0
9	137273321	+	1	1	0	1	0	0
9	137300354	-	1	0	0	0	0	0
9	137301157	-	1	1	0	1	1	1
9	137301571	-	1	1	0	1	1	0
9	137301635	-	1	1	0	1	1	1
9	137448453	-	1	1	0	0	0	0
9	137449309	-	1	1	0	1	0	1
9	137552388	+	1	1	0	1	1	1
9	137552393	+	1	0	0	0	0	0
9	137552394	+	1	0	0	0	0	0
9	137552397	+	1	1	0	1	0	1
9	137555341	-	1	0	0	1	1	1
9	137582329	-	1	1	0	1	0	0
9	137582481	-	1	1	0	0	0	0
9	137582483	-	1	1	0	1	1	1
9	137835341	+	1	0	0	0	0	0
16	57306	+	1	1	0	1	0	1
16	86741	-	1	0	0	1	0	0
16	89727	-	1	1	0	0	0	0
16	265931	+	1	1	0	1	1	0
16	288125	-	1	0	0	1	0	1
16	298062	-	1	0	0	0	0	0
16	367608	-	1	1	0	1	1	1
16	400536	+	1	1	0	1	1	1
16	400564	+	1	1	0	1	1	1
16	583030	+	1	1	0	0	1	1
16	583269	+	1	1	0	1	0	0
16	629128	+	1	0	0	0	0	0
16	634519	-	1	0	0	1	1	0
16	673726	+	1	1	0	1	0	0
16	682478	+	1	0	0	0	0	0
16	682614	+	1	1	0	1	1	0
16	681759	-	1	1	0	1	1	0
16	682559	-	1	0	0	1	1	1
16	682560	-	1	0	0	0	0	0
16	682775	-	1	1	0	1	1	1
16	686924	-	1	1	0	1	0	1
16	689844	-	1	0	0	0	0	0
16	717193	+	1	1	0	1	0	0
16	733314	-	1	0	0	1	0	0
16	784986	-	1	1	0	1	1	0
16	785956	-	1	1	0	1	0	1
16	786014	-	1	1	0	1	1	1
16	786016	-	1	1	0	0	0	0
16	786145	-	1	0	0	1	1	0
16	786235	-	1	1	0	1	1	1
16	1349376	-	1	0	0	1	0	0
16	1349383	-	1	1	0	0	0	0
16	1349385	-	1	1	0	1	1	1
16	1349440	-	1	1	0	0	1	0
16	1420171	-	1	1	0	1	1	1
16	1420339	-	1	1	0	1	0	1
16	1420431	-	1	1	0	1	0	1
16	1445813	-	1	1	0	1	1	0
16	1445992	-	1	1	0	1	1	0
16	1446184	-	1	1	0	1	1	1
16	1509899	+	1	0	0	0	0	0
16	1510147	+	1	1	0	1	1	0
16	1510149	+	1	1	0	0	0	0
16	1699337	+	1	0	0	1	1	1
16	1770408	-	1	0	0	1	0	0
16	1772173	-	1	1	0	1	1	0
16	1772210	-	1	0	0	1	0	0
16	1772251	-	1	1	0	0	1	1
16	1772280	-	1	0	0	1	1	1
16	1789024	+	1	1	0	1	1	1
16	1809153	-	1	1	0	1	1	0
16	1828480	+	1	1	0	0	0	0
16	1938728	-	1	1	0	0	0	0
16	1986053	+	1	1	0	1	0	1
16	1997968	-	1	1	0	1	0	0
16	1998094	-	1	1	0	1	1	0
16	1998358	-	1	0	0	1	1	0
16	1998448	-	1	1	0	1	0	1
16	1999643	-	1	1	0	1	0	0
16	2038029	+	1	0	0	0	0	0
16	2046290	-	1	0	0	1	1	0
16	2088521	+	1	0	0	0	0	0
16	2176930	+	1	0	0	0	0	0
16	2208893	+	1	1	0	1	1	1
16	2208981	+	1	0	0	1	1	1
16	2209100	+	1	1	0	1	1	1
16	2213776	-	1	0	0	0	1	0
16	2213806	-	1	1	0	1	1	1
16	2213905	-	1	1	0	1	1	1
16	2214175	-	1	1	0	1	0	0
16	2235489	+	1	1	0	1	0	1
16	2456991	+	1	0	0	0	1	1
16	2464863	+	1	1	0	0	1	0
16	2519809	+	1	0	0	0	0	0
16	2519928	+	1	1	0	1	1	1
16	2707599	+	1	1	0	1	1	1
16	2708005	+	1	1	0	0	0	0
16	2976770	-	1	1	0	1	1	0
16	2972455	+	1	1	0	1	1	1
16	3022725	-	1	1	0	1	0	0
16	3022851	-	1	1	0	1	1	1
16	3119404	+	1	0	0	0	0	0
16	3119405	+	1	0	0	0	0	0
16	3119406	+	1	1	0	0	0	0
16	3119678	+	1	1	0	1	1	1
16	3486627	+	1	0	0	1	1	1
16	3486682	+	1	1	0	1	1	0
16	3486822	+	1	1	0	1	0	0
16	3486939	+	1	1	0	0	0	0
16	4455819	+	1	0	0	0	0	0
16	4461795	-	1	1	0	1	1	0
16	4507842	+	1	1	0	1	1	0
16	4507844	+	1	1	0	0	0	0
16	4508057	+	1	1	0	1	0	0
16	4508085	+	1	1	0	1	1	0
16	4609007	-	1	1	0	1	1	0
16	4609296	-	1	1	0	1	1	0
16	4609502	-	1	1	0	1	0	1
16	4609707	-	1	1	0	0	0	0
16	4805114	-	1	0	0	0	0	0
16	5084873	+	1	1	0	0	0	1
16	8848811	+	1	0	0	0	0	0
16	8855123	-	1	1	0	1	0	1
16	8855125	-	1	0	0	0	0	0
16	8855179	-	1	0	0	0	0	0
16	8855181	-	1	1	0	1	1	0
16	9103158	+	1	1	0	0	0	0
16	9103159	+	1	1	0	0	0	0
16	10929249	-	1	1	0	1	1	1
16	10929265	-	1	1	0	1	0	1
16	10929483	-	1	0	0	1	0	0
16	10941799	-	1	0	0	1	0	0
16	10941814	-	1	1	0	1	1	1
16	11345709	+	1	0	0	1	1	1
16	11351448	+	1	1	0	0	0	0
16	11679200	-	1	1	0	0	0	0
16	11679202	-	1	1	0	0	0	0
16	11691456	-	1	0	0	0	0	0
16	11691501	-	1	1	0	1	0	1
16	11691877	-	1	1	0	0	1	0
16	11837496	-	1	1	0	0	0	1
16	11837680	-	1	1	0	1	1	1
16	11837901	-	1	1	0	0	0	0
16	14644383	+	1	1	0	1	0	0
16	14650317	+	1	0	0	0	0	0
16	14664959	+	1	1	0	1	0	0
16	14668119	+	1	0	0	0	0	0
16	14895656	+	1	1	0	1	0	0
16	14895851	+	1	1	0	0	0	1
16	16142854	+	1	0	0	0	0	0
16	16142855	+	1	0	0	0	0	0
16	16294505	+	1	1	0	0	0	0
16	18417629	-	1	0	0	0	0	0
16	18500228	-	1	1	0	0	0	0
16	19503567	-	1	1	0	1	1	0
16	19707154	-	1	1	0	0	0	0
16	21617915	+	1	1	0	1	0	0
16	21655348	+	1	0	0	0	0	0
16	21655382	+	1	0	0	0	0	0
16	21655517	+	1	1	0	0	0	0
16	21655520	+	1	1	0	1	0	1
16	21655530	+	1	0	0	1	0	0
16	21655614	+	1	0	0	0	0	0
16	21655794	+	1	1	0	0	0	0
16	22346891	-	1	0	0	0	0	0
16	22347501	-	1	0	0	0	0	0
16	23570556	+	1	0	0	0	0	0
16	23570634	+	1	1	0	1	1	1
16	23690082	+	1	1	0	1	1	1
16	27461033	-	1	1	0	0	0	0
16	27461208	-	1	1	0	0	0	0
16	27464522	-	1	1	0	1	1	1
16	28098152	-	1	0	0	0	0	0
16	28098208	-	1	1	0	0	0	0
16	28098210	-	1	1	0	1	1	1
16	28098512	-	1	1	0	0	1	0
16	28098581	-	1	1	0	0	0	0
16	28156154	-	1	0	0	0	0	0
16	28842854	-	1	1	0	1	1	0
16	29807035	+	1	1	0	1	1	1
16	29807743	+	1	1	0	1	1	0
16	29816781	+	1	1	0	1	1	1
16	29820065	+	1	1	0	1	1	0
16	29858447	-	1	0	0	0	0	0
16	29858515	-	1	0	0	1	0	0
16	29859013	-	1	0	0	0	0	0
16	29863069	-	1	0	0	1	1	0
16	30085201	+	1	1	0	1	1	1
16	30092556	-	1	1	0	1	0	1
16	30193952	+	1	0	0	0	0	0
16	30353003	-	1	1	0	1	1	1
16	30353665	-	1	0	0	0	0	0
16	30353667	-	1	1	0	0	1	1
16	30353695	-	1	1	0	1	0	1
16	30357779	-	1	1	0	1	1	1
16	30358270	-	1	0	0	1	1	1
16	30369348	-	1	1	0	1	1	1
16	30369389	-	1	1	0	1	1	1
16	30369516	-	1	0	0	1	0	1
16	30369633	-	1	0	0	1	1	1
16	30397886	+	1	0	0	1	1	1
16	30398050	+	1	0	0	1	1	0
16	30398406	+	1	0	0	1	0	0
16	30417948	+	1	1	0	1	1	1
16	30418292	+	1	0	0	0	0	0
16	30418296	+	1	1	0	1	1	0
16	30424216	-	1	1	0	1	1	0
16	30424269	-	1	1	0	1	1	1
16	30424377	-	1	0	0	1	0	1
16	30443772	-	1	1	0	1	1	1
16	30443833	-	1	1	0	1	0	1
16	30443847	-	1	1	0	1	1	1
16	30443975	-	1	1	0	0	1	0
16	30444355	-	1	1	0	1	0	0
16	30444370	-	1	0	0	1	1	0
16	30445802	-	1	1	0	1	0	0
16	30524356	-	1	1	0	1	1	0
16	30524539	-	1	1	0	1	1	1
16	30524589	-	1	1	0	1	1	0
16	30524592	-	1	1	0	0	0	0
16	30524746	-	1	0	0	1	1	1
16	30524748	-	1	0	0	0	0	0
16	30525513	-	1	1	0	1	1	0
16	30525681	-	1	0	0	1	1	1
16	30525752	-	1	1	0	1	1	1
16	30525773	-	1	1	0	1	1	1
16	30604638	-	1	0	0	0	0	0
16	30605226	-	1	1	0	0	0	0
16	30669419	+	1	1	0	1	1	0
16	30670436	+	1	1	0	0	0	0
16	30724780	+	1	0	0	0	0	0
16	30738387	+	1	0	0	0	0	0
16	30738896	+	1	1	0	1	1	0
16	30738935	+	1	1	0	1	1	0
16	30739436	+	1	1	0	1	0	0
16	30756891	+	1	1	0	1	1	0
16	30757048	+	1	0	0	0	0	0
16	30757098	+	1	1	0	1	0	1
16	30774130	+	1	1	0	1	1	1
16	30774572	+	1	0	0	0	0	0
16	30774573	+	1	0	0	0	0	0
16	30774637	+	1	1	0	1	1	1
16	30774873	+	1	0	0	1	1	1
16	30775013	+	1	1	0	1	1	1
16	30775113	+	1	0	0	1	0	0
16	30781039	-	1	0	0	1	1	0
16	30948410	+	1	1	0	0	0	0
16	31061690	-	1	1	0	0	0	0
16	31090939	-	1	0	0	1	1	1
16	31090985	-	1	1	0	1	1	1
16	31111990	+	1	1	0	1	1	1
16	31112015	+	1	1	0	0	0	0
16	46929076	+	1	1	0	1	0	0
16	46930841	+	1	1	0	0	0	0
16	46956925	-	1	1	0	1	1	0
16	46957055	-	1	0	0	1	0	0
16	56362765	-	1	1	0	1	0	0
16	56940141	+	1	1	0	1	1	0
16	56943236	+	1	0	0	0	0	0
16	56943237	+	1	1	0	0	0	0
16	56943332	+	1	1	0	1	1	1
16	56943370	+	1	1	0	1	1	0
16	57154243	-	1	1	0	1	1	0
16	57252355	+	1	1	0	1	1	1
16	57252430	+	1	1	0	1	0	0
16	57428691	-	1	1	0	1	0	0
16	57428980	-	1	0	0	1	0	0
16	57512494	-	1	1	0	1	0	0
16	57756941	+	1	1	0	1	1	0
16	58404873	+	1	1	0	1	1	0
16	58707343	-	1	1	0	1	1	1
16	58707414	-	1	0	0	1	0	0
16	58708001	-	1	0	0	1	1	1
16	58708102	-	1	1	0	0	0	0
16	58708104	-	1	0	0	0	0	0
16	58708145	-	1	1	0	1	0	1
16	67154499	-	1	0	0	0	0	0
16	67154561	-	1	0	0	1	0	0
16	67198156	+	1	1	0	0	0	0
16	67198321	+	1	1	0	0	1	0
16	67438357	-	1	1	0	1	1	0
16	67438863	-	1	0	0	0	0	0
16	67675118	-	1	1	0	1	0	1
16	67843683	+	1	0	0	0	0	0
16	67843714	+	1	1	0	1	1	1
16	67843826	+	1	1	0	1	0	0
16	67843971	+	1	1	0	1	0	1
16	67871135	+	1	0	0	0	0	0
16	67871137	+	1	0	0	1	1	0
16	67928170	+	1	0	0	1	0	0
16	67928292	+	1	1	0	1	0	0
16	68021443	-	1	1	0	1	1	0
16	68301280	-	1	0	0	0	0	0
16	69118253	-	1	1	0	1	1	0
16	69118329	-	1	1	0	0	1	1
16	69118426	-	1	1	0	1	0	1
16	69118696	-	1	0	0	0	0	1
16	69120488	-	1	0	0	0	0	0
16	69324289	+	1	1	0	1	1	0
16	69328714	-	1	1	0	1	1	0
16	69328889	-	1	1	0	0	0	0
16	69328910	-	1	0	0	1	1	1
16	69329025	-	1	1	0	1	1	1
16	69329067	-	1	1	0	1	1	1
16	69329103	-	1	0	0	1	0	1
16	69335043	-	1	1	0	1	0	0
16	69367030	-	1	1	0	1	1	0
16	69341766	+	1	1	0	1	1	0
16	69742379	-	1	0	0	0	0	1
16	70252401	-	1	1	0	1	0	0
16	70252637	-	1	1	0	1	1	1
16	70252653	-	1	0	0	1	1	1
16	70372276	+	1	0	0	1	0	0
16	70372568	+	1	0	0	0	0	0
16	70372902	+	1	1	0	1	1	0
16	70480860	-	1	1	0	1	0	1
16	70529025	+	1	0	0	0	0	0
16	70529026	+	1	0	0	0	0	0
16	70571843	+	1	1	0	1	1	0
16	70571920	+	1	0	0	0	0	0
16	70571921	+	1	1	0	0	0	0
16	70571923	+	1	1	0	1	1	0
16	70687667	-	1	1	0	1	1	0
16	70687846	-	1	1	0	1	0	1
16	71927993	+	1	0	0	0	0	0
16	71927995	+	1	1	0	1	1	1
16	71928161	+	1	1	0	1	1	1
16	71928212	+	1	1	0	0	0	0
16	72112593	+	1	1	0	1	0	1
16	74305357	+	1	1	0	1	1	1
16	74305902	+	1	1	0	1	0	0
16	74306068	+	1	0	0	0	0	0
16	75229411	-	1	0	0	1	0	0
16	75229589	-	1	1	0	1	1	0
16	75229733	-	1	0	0	1	1	1
16	75235076	-	1	1	0	1	0	1
16	75235174	-	1	1	0	1	0	1
16	75235462	-	1	1	0	1	1	1
16	77194757	+	1	0	0	0	0	0
16	79596934	-	1	1	0	0	0	0
16	80976048	-	1	1	0	1	1	0
16	80976050	-	1	0	0	0	0	0
16	80976051	-	1	0	0	0	0	0
16	83811610	+	1	0	0	1	1	0
16	84054187	-	1	1	0	0	0	0
16	84054188	-	1	1	0	0	0	0
16	84054189	-	1	0	0	0	0	0
16	84745418	+	1	1	0	1	1	0
16	84779291	+	1	1	0	0	0	0
16	85677785	-	1	0	0	0	0	0
16	85677870	-	1	1	0	1	1	0
16	85678024	-	1	1	0	1	1	0
16	85678218	-	1	1	0	1	0	1
16	87329506	-	1	0	0	0	0	0
16	87830473	-	1	0	0	1	1	0
16	87830475	-	1	1	0	0	0	0
16	87830486	-	1	1	0	0	0	0
16	87830505	-	1	0	0	1	0	0
16	87830556	-	1	0	0	1	1	1
16	87831035	-	1	0	0	0	0	0
16	87831037	-	1	1	0	1	1	0
16	87831095	-	1	1	0	1	1	0
16	87831151	-	1	0	0	1	1	1
16	87831199	-	1	1	0	1	1	1
16	87831240	-	1	1	0	1	1	0
16	87831265	-	1	1	0	0	0	0
16	87831267	-	1	1	0	1	1	1
16	87831351	-	1	1	0	1	1	1
16	87831684	-	1	0	0	1	0	0
16	87832482	-	1	1	0	1	1	1
16	87832553	-	1	0	0	0	0	0
16	87832771	-	1	1	0	1	0	0
16	88535127	+	1	1	0	1	1	0
16	88696981	-	1	0	0	0	0	0
16	88697235	-	1	1	0	1	0	0
16	88697474	-	1	1	0	1	0	1
16	88808296	+	1	1	0	1	1	1
16	88808298	+	1	1	0	0	0	0
16	88808352	+	1	1	0	0	0	0
16	88808710	+	1	0	0	1	0	0
16	88809014	+	1	0	0	0	0	0
16	88809015	+	1	1	0	0	0	0
16	88809017	+	1	0	0	1	1	0
16	88809158	+	1	1	0	1	0	1
16	88809182	+	1	1	0	1	0	1
16	89154567	+	1	0	0	0	0	0
16	89563055	+	1	1	0	1	1	1
16	89563143	+	1	1	0	1	1	1
16	89563179	+	1	0	0	0	0	0
16	89563181	+	1	1	0	1	1	1
16	89563183	+	1	1	0	0	0	0
16	89563246	+	1	1	0	1	0	1
16	89563301	+	1	1	0	1	1	1
16	89644992	-	1	1	0	1	1	0
16	89645636	-	1	1	0	0	1	1
16	89645760	-	1	1	0	0	0	0
18	12325318	+	1	1	0	1	1	1
18	12326291	+	1	0	0	0	0	0
18	12326347	+	1	0	0	0	0	0
18	12329283	-	1	1	0	1	0	0
18	23257465	+	1	1	0	0	0	0
18	35468568	-	1	1	0	0	0	0
18	49482305	-	1	0	0	0	0	0
18	49482348	-	1	0	0	0	0	0
18	50282446	-	1	1	0	1	0	0
18	51078460	+	1	0	0	0	0	0
18	56602950	-	1	1	0	1	0	0
18	59902832	+	1	0	0	1	1	0
18	59903028	+	1	1	0	1	1	0
18	59903116	+	1	0	0	0	0	0
18	63331700	-	1	0	0	0	0	0
18	74520744	+	1	0	0	0	0	0
18	74520746	+	1	1	0	1	1	0
18	79903233	-	1	0	0	0	0	0
18	79903630	-	1	1	0	1	1	1
18	79973709	-	1	1	0	1	1	1
18	80046078	+	1	0	0	1	0	1
8	11802926	+	1	0	0	1	0	0
8	11838581	+	1	0	0	0	0	0
8	11838592	+	1	1	0	0	0	0
8	11838594	+	1	0	0	1	1	0
8	11838737	+	1	0	0	1	0	0
8	22138422	-	1	1	0	1	0	1
8	22250570	+	1	1	0	0	0	0
8	22250739	+	1	1	0	1	0	0
8	22593979	+	1	0	0	0	1	1
8	23260615	+	1	1	0	0	0	1
8	23290197	+	1	0	0	0	0	1
8	23290213	+	1	1	0	1	1	1
8	23290242	+	1	0	0	1	0	0
8	24952666	-	1	0	0	1	0	0
8	26370675	+	1	0	0	1	1	1
8	37697403	+	1	0	0	0	0	0
8	37697404	+	1	1	0	0	0	0
8	37697589	+	1	1	0	1	1	1
8	37697628	+	1	1	0	1	1	1
8	37697630	+	1	1	0	0	0	0
8	37697635	+	1	0	0	0	0	0
8	37698347	+	1	1	0	1	1	1
8	37698604	+	1	1	0	1	1	1
8	37698634	+	1	1	0	1	1	1
8	37698810	+	1	1	0	1	1	0
8	37753991	+	1	0	0	0	0	0
8	37843993	-	1	1	0	0	0	0
8	37844979	-	1	1	0	1	1	1
8	38059927	+	1	1	0	1	1	1
8	38060208	+	1	1	0	1	1	1
8	38060217	+	1	0	0	0	0	0
8	38060218	+	1	0	0	1	1	1
8	38163458	-	1	1	0	0	0	0
8	38163578	-	1	0	0	1	1	0
8	38163580	-	1	1	0	0	0	0
8	38163582	-	1	0	0	0	0	0
8	41599196	+	1	1	0	1	0	0
8	41621093	+	1	1	0	0	0	0
8	42175567	-	1	1	0	1	1	0
8	42175906	-	1	1	0	0	0	0
8	54147579	+	1	0	0	0	0	0
8	56963801	-	1	1	0	0	1	0
8	58581852	+	1	0	0	1	0	0
8	66429763	+	1	1	0	1	1	0
8	66430198	+	1	0	0	0	1	0
8	66430200	+	1	0	0	0	0	0
8	66430420	+	1	0	0	0	0	0
8	66430569	+	1	1	0	1	1	0
8	73981365	+	1	1	0	0	0	0
8	73981527	+	1	0	0	0	0	0
8	79764262	-	1	1	0	1	1	0
8	79764562	-	1	0	0	1	1	1
8	79764563	-	1	0	0	0	0	0
8	79764564	-	1	0	0	0	0	0
8	79765053	-	1	0	0	0	0	0
8	79765134	-	1	1	0	1	1	1
8	79765217	-	1	1	0	1	1	0
8	79765219	-	1	0	0	0	0	0
8	79765355	-	1	1	0	1	1	1
8	79765357	-	1	0	0	0	0	0
8	79765547	-	1	1	0	1	0	1
8	79765574	-	1	1	0	0	1	1
8	79765673	-	1	1	0	1	1	1
8	79765740	-	1	1	0	1	1	1
8	79919015	-	1	0	0	0	0	0
8	85480871	+	1	0	0	1	1	0
8	89790192	+	1	0	0	1	1	0
8	96333604	+	1	0	0	0	0	0
8	96333727	+	1	0	0	0	0	0
8	96333951	+	1	1	0	1	0	0
8	97724800	+	1	1	0	0	1	1
8	100703102	-	1	0	0	0	0	0
8	100718153	-	1	0	0	0	1	0
8	100721449	-	1	0	0	0	0	0
8	100721578	-	1	0	0	1	1	1
8	116847267	-	1	0	0	1	1	0
8	123014972	-	1	0	0	0	0	0
8	123015090	-	1	1	0	1	0	0
8	123015354	-	1	1	0	1	0	0
8	124999261	+	1	1	0	1	0	0
8	126553497	-	1	1	0	0	0	0
8	127740590	+	1	1	0	1	1	1
8	127740620	+	1	1	0	1	1	1
8	127740911	+	1	0	0	0	0	0
8	127741024	+	1	0	0	0	0	0
8	127741068	+	1	0	0	0	0	0
8	127741070	+	1	1	0	1	1	1
8	140515290	+	1	0	0	1	1	0
8	142727518	+	1	1	0	1	0	1
8	142727524	+	1	0	0	1	0	0
8	142735764	+	1	0	0	0	0	0
8	143022078	+	1	0	0	1	1	1
8	143276702	+	1	1	0	1	0	0
8	143538502	-	1	0	0	1	0	0
8	143599299	+	1	1	0	1	0	0
8	143599649	+	1	1	0	1	0	1
8	143599848	+	1	1	0	0	1	0
8	143604312	-	1	1	0	1	1	0
8	143816519	-	1	1	0	1	1	1
8	143816532	-	1	1	0	1	1	1
8	143993012	+	1	0	0	1	0	1
8	144080324	+	1	1	0	0	0	0
8	144080326	+	1	1	0	1	1	1
8	144080444	+	1	1	0	1	1	0
8	144085049	+	1	0	0	0	0	0
8	144086163	+	1	1	0	1	0	0
8	144107321	+	1	1	0	1	1	1
8	144107394	+	1	0	0	1	0	0
8	144262183	-	1	1	0	1	1	0
8	144309867	+	1	0	0	0	0	0
8	144314313	+	1	0	0	1	0	0
8	144314451	+	1	1	0	1	1	0
8	144314569	+	1	1	0	1	0	0
8	144360989	+	1	1	0	1	1	1
8	144412431	-	1	0	0	0	0	0
8	144412432	-	1	0	0	0	0	0
8	144526542	-	1	1	0	1	0	1
8	144527284	-	1	1	0	1	1	0
8	144527378	-	1	1	0	1	0	0
8	144850592	-	1	1	0	1	0	0
8	144850677	-	1	0	0	0	0	0
8	144851150	-	1	1	0	1	1	1
8	144851213	-	1	0	0	1	0	1
15	29268772	-	1	1	0	1	0	0
15	29268875	-	1	1	0	1	1	1
15	34229904	+	1	0	0	0	0	0
15	34229906	+	1	1	0	1	1	0
15	34229944	+	1	0	0	1	0	0
15	34341778	-	1	1	0	0	1	0
15	34341897	-	1	1	0	1	1	1
15	40553754	-	1	1	0	1	0	0
15	40573863	+	1	1	0	1	0	1
15	40731173	+	1	1	0	1	1	0
15	40955807	+	1	1	0	1	0	0
15	40955843	+	1	0	0	0	0	0
15	40956019	+	1	1	0	1	1	0
15	43191503	+	1	1	0	1	0	1
15	43599386	+	1	1	0	0	0	0
15	43699167	+	1	1	0	1	1	0
15	43699200	+	1	1	0	0	0	0
15	43699201	+	1	1	0	0	0	0
15	43699202	+	1	1	0	0	0	0
15	43771248	+	1	1	0	1	1	1
15	44715570	+	1	0	0	0	0	0
15	44715590	+	1	1	0	1	0	0
15	48878836	+	1	0	0	1	1	1
15	48878882	+	1	0	0	1	1	0
15	48879161	+	1	1	0	0	1	0
15	48879604	+	1	1	0	0	0	0
15	48879648	+	1	0	0	0	0	0
15	48879650	+	1	1	0	0	1	0
15	57714726	+	1	1	0	0	0	0
15	60006097	+	1	0	0	1	0	0
15	64155886	-	1	1	0	1	1	1
15	64155918	-	1	0	0	0	1	0
15	64156012	-	1	1	0	1	1	1
15	64688602	-	1	1	0	1	0	0
15	64963200	-	1	0	0	1	0	0
15	65578986	-	1	0	0	0	0	0
15	65579131	-	1	0	0	1	1	0
15	66337081	-	1	1	0	1	1	0
15	66499361	-	1	0	0	0	0	0
15	66499363	-	1	1	0	1	0	0
15	67526473	+	1	1	0	1	1	1
15	67526493	+	1	1	0	0	1	0
15	68208270	-	1	0	0	0	0	0
15	70049897	-	1	0	0	0	0	0
15	70831698	-	1	1	0	1	1	0
15	70831932	-	1	0	0	0	0	0
15	70832151	-	1	1	0	0	0	0
15	70832318	-	1	0	0	1	1	1
15	70832320	-	1	0	0	0	0	0
15	72199305	-	1	1	0	1	1	1
15	72199401	-	1	0	0	1	1	1
15	72752157	-	1	1	0	1	0	0
15	72752572	-	1	0	0	1	0	0
15	72752600	-	1	1	0	0	1	1
15	73713125	+	1	1	0	1	1	1
15	73714433	+	1	1	0	1	1	0
15	74629985	+	1	1	0	0	0	0
15	74632810	-	1	0	0	1	1	1
15	74802548	+	1	1	0	1	1	1
15	74802569	+	1	1	0	1	1	1
15	74837005	-	1	1	0	1	0	0
15	74897826	+	1	0	0	1	0	1
15	74955379	-	1	1	0	1	1	1
15	74955487	-	1	1	0	1	0	0
15	74955662	-	1	1	0	1	0	0
15	74955714	-	1	1	0	1	1	0
15	74955845	-	1	1	0	1	1	0
15	74955873	-	1	1	0	1	1	0
15	74955974	-	1	1	0	1	1	1
15	75211242	+	1	1	0	1	1	0
15	75211363	+	1	1	0	0	0	0
15	75211403	+	1	1	0	1	1	0
15	75211459	+	1	1	0	1	1	0
15	75340118	+	1	1	0	1	1	1
15	75340162	+	1	0	0	0	0	0
15	75340185	+	1	0	0	1	0	0
15	75371583	-	1	1	0	0	0	0
15	75639169	-	1	0	0	0	0	0
15	75639259	-	1	1	0	1	1	1
15	75639423	-	1	1	0	0	0	0
15	75639517	-	1	1	0	1	0	0
15	75639519	-	1	1	0	0	0	0
15	75639926	-	1	1	0	1	1	1
15	75640037	-	1	1	0	1	1	1
15	76341972	+	1	1	0	1	0	0
15	76342019	+	1	1	0	0	0	0
15	76342271	+	1	1	0	0	0	0
15	76342320	+	1	1	0	0	0	0
15	77046715	-	1	1	0	1	1	1
15	78549054	+	1	1	0	1	1	0
15	78921821	-	1	1	0	1	0	0
15	78921877	-	1	1	0	1	0	0
15	78921892	-	1	1	0	1	0	0
15	78921894	-	1	1	0	0	0	0
15	79322442	+	1	1	0	1	1	1
15	79845099	-	1	1	0	0	0	0
15	79889262	-	1	1	0	1	1	0
15	80978832	-	1	1	0	1	1	0
15	80979408	-	1	1	0	1	1	1
15	81002509	+	1	1	0	1	0	1
15	81002511	+	1	1	0	0	0	0
15	81002599	+	1	1	0	1	1	1
15	81003232	+	1	1	0	1	1	1
15	81003324	+	1	1	0	1	0	0
15	81003579	+	1	1	0	1	0	0
15	82990024	+	1	1	0	1	0	0
15	84643590	-	1	1	0	1	1	1
15	88459555	-	1	1	0	1	1	0
15	88459727	-	1	1	0	1	1	0
15	88512915	-	1	0	0	0	0	0
15	88478030	+	1	1	0	1	0	0
15	88626549	+	1	1	0	1	0	1
15	88630280	+	1	1	0	1	1	0
15	88630599	+	1	0	0	0	0	0
15	89628153	-	1	1	0	1	0	0
15	89835378	-	1	1	0	1	1	1
15	90271458	+	1	0	0	0	0	0
15	90271459	+	1	1	0	0	0	0
15	90271460	+	1	1	0	0	0	0
15	90271462	+	1	1	0	1	1	0
15	90271499	+	1	1	0	0	0	0
15	90271512	+	1	1	0	1	1	1
15	90271558	+	1	1	0	1	1	0
15	90271851	+	1	1	0	0	0	0
15	90271983	+	1	0	0	0	0	0
15	90272157	+	1	1	0	1	0	0
15	90931147	-	1	1	0	1	0	0
15	90953666	+	1	1	0	1	0	1
15	92897914	+	1	1	0	1	1	0
15	92897935	+	1	0	0	0	0	0
15	92897950	+	1	1	0	1	1	0
15	93044846	-	1	1	0	1	0	0
15	96334501	+	1	1	0	1	0	1
15	96337791	+	1	1	0	0	0	1
15	101304753	-	1	0	0	0	0	0
15	101305195	-	1	0	0	0	0	0
22	17137714	-	1	0	0	0	1	1
22	17137985	-	1	0	0	1	1	0
22	17138123	-	1	1	0	1	1	1
22	17138125	-	1	0	0	0	0	0
22	17727399	+	1	1	0	0	0	0
22	19036621	-	1	1	0	1	1	0
22	19037763	-	1	1	0	1	0	0
22	19038400	-	1	1	0	1	1	1
22	19038717	-	1	0	0	1	0	0
22	19133949	-	1	0	0	1	1	0
22	19134039	-	1	0	0	0	1	1
22	19134041	-	1	1	0	0	0	0
22	19134126	-	1	1	0	1	1	1
22	19134169	-	1	0	0	1	0	0
22	19134171	-	1	1	0	0	0	0
22	19134244	-	1	1	0	1	1	1
22	19330898	-	1	0	0	1	1	0
22	19444193	-	1	1	0	1	0	1
22	19435960	+	1	0	0	0	0	0
22	19788592	-	1	0	0	1	0	1
22	19788614	-	1	1	0	0	0	0
22	19968916	+	1	0	0	0	0	0
22	19968917	+	1	0	0	0	0	0
22	20314539	-	1	1	0	1	0	0
22	20425059	-	1	0	0	1	0	0
22	20425645	-	1	0	0	0	0	0
22	20425646	-	1	0	0	0	0	0
22	20425829	-	1	0	0	1	0	0
22	20441759	-	1	0	0	1	0	0
22	20442076	-	1	1	0	1	0	1
22	20465166	-	1	1	0	0	1	1
22	20465242	-	1	1	0	1	1	1
22	20465454	-	1	0	0	1	0	0
22	20953211	+	1	1	0	0	0	0
22	20997287	+	1	0	0	0	0	0
22	20997772	+	1	1	0	0	0	0
22	20999844	-	1	0	0	0	0	0
22	20999867	-	1	1	0	1	1	1
22	20999913	-	1	1	0	1	1	0
22	20999935	-	1	1	0	1	1	1
22	20999937	-	1	1	0	0	0	0
22	20999996	-	1	1	0	1	1	0
22	20999998	-	1	0	0	0	0	0
22	21000122	-	1	1	0	1	1	1
22	21000279	-	1	0	0	1	0	0
22	21000281	-	1	0	0	0	0	0
22	21621598	+	1	1	0	1	0	1
22	21621664	+	1	1	0	1	0	1
22	21621743	+	1	1	0	1	0	0
22	21621798	+	1	0	0	1	0	1
22	21628297	-	1	1	0	1	1	1
22	21628312	-	1	0	0	1	1	1
22	21628406	-	1	0	0	1	1	1
22	21628490	-	1	1	0	0	1	1
22	21643944	+	1	1	0	1	1	1
22	21644167	+	1	1	0	0	0	0
22	21644168	+	1	0	0	1	1	1
22	21697196	+	1	1	0	0	0	1
22	21697508	+	1	0	0	0	1	1
22	23315725	+	1	1	0	0	0	0
22	23971561	-	1	0	0	1	0	0
22	23971570	-	1	0	0	1	0	0
22	26464088	-	1	0	0	1	1	1
22	26464089	-	1	0	0	0	0	0
22	26464236	-	1	1	0	1	0	0
22	26492202	-	1	1	0	1	0	0
22	28795141	-	1	0	0	1	0	0
22	28795215	-	1	1	0	0	0	0
22	28795217	-	1	1	0	1	1	1
22	28795220	-	1	1	0	0	0	0
22	28795256	-	1	1	0	1	1	1
22	28795292	-	1	1	0	1	1	0
22	28795621	-	1	1	0	1	0	0
22	28795697	-	1	0	0	0	1	0
22	29555830	-	1	1	0	1	1	0
22	29731095	-	1	0	0	1	0	0
22	29769869	+	1	1	0	0	0	0
22	30334346	-	1	0	0	1	1	0
22	30428631	+	1	1	0	0	0	0
22	30428633	+	1	0	0	1	0	1
22	30428676	+	1	1	0	0	0	0
22	30428774	+	1	1	0	1	1	0
22	30576641	-	1	0	0	0	0	0
22	30576960	-	1	1	0	1	1	0
22	30576975	-	1	0	0	1	0	1
22	31205408	+	1	0	0	0	0	0
22	31344818	-	1	1	0	1	1	0
22	31344882	-	1	1	0	0	0	1
22	31345064	-	1	0	0	1	0	0
22	31956335	+	1	1	0	0	0	0
22	31956676	+	1	1	0	1	1	1
22	31956678	+	1	1	0	0	0	0
22	31956703	+	1	1	0	1	0	0
22	31957262	+	1	1	0	1	1	0
22	31957293	+	1	1	0	0	0	0
22	32387913	-	1	0	0	0	0	0
22	32387935	-	1	1	0	1	0	1
22	32479072	+	1	1	0	1	1	0
22	35347457	+	1	1	0	0	0	0
22	35424273	+	1	1	0	1	1	1
22	35424281	+	1	1	0	1	1	1
22	35838355	-	1	1	0	1	0	0
22	35838495	-	1	1	0	1	0	0
22	36467274	-	1	0	0	1	0	0
22	36467753	-	1	0	0	1	1	1
22	37018220	-	1	0	0	0	0	0
22	37018259	-	1	1	0	1	0	1
22	37018668	-	1	1	0	1	1	1
22	37024759	+	1	1	0	1	1	0
22	37029261	+	1	0	0	0	0	0
22	37029335	+	1	1	0	1	0	1
22	37029522	+	1	1	0	0	0	0
22	37029525	+	1	1	0	1	1	1
22	37029527	+	1	1	0	0	0	0
22	37029664	+	1	1	0	1	1	1
22	37566216	+	1	1	0	1	1	1
22	37566479	+	1	1	0	1	1	1
22	37566527	+	1	0	0	1	1	0
22	37568215	+	1	1	0	0	1	1
22	37568239	+	1	0	0	1	0	1
22	37568311	+	1	0	0	0	0	0
22	37568313	+	1	1	0	1	1	0
22	37568495	+	1	1	0	1	1	0
22	37568497	+	1	1	0	0	0	0
22	37665843	+	1	1	0	0	0	0
22	37665866	+	1	1	0	1	1	0
22	37666655	+	1	1	0	0	0	0
22	37666656	+	1	1	0	0	0	0
22	37805791	+	1	0	0	0	0	0
22	37805793	+	1	0	0	1	1	0
22	37806024	+	1	1	0	0	0	0
22	37806025	+	1	1	0	0	0	0
22	37806027	+	1	0	0	1	1	0
22	37806150	+	1	1	0	1	1	1
22	37806241	+	1	0	0	1	1	1
22	37806316	+	1	1	0	1	1	0
22	37806318	+	1	1	0	0	0	0
22	37831858	-	1	1	0	1	0	1
22	37877782	+	1	1	0	1	1	1
22	37877827	+	1	1	0	0	0	0
22	37878034	+	1	1	0	1	1	1
22	37940983	+	1	1	0	1	1	0
22	37941092	+	1	1	0	1	0	0
22	38075103	+	1	1	0	0	1	1
22	38075437	+	1	1	0	1	1	0
22	38221230	-	1	1	0	1	1	0
22	38221345	-	1	1	0	1	1	1
22	38291109	-	1	1	0	1	1	0
22	38291244	-	1	1	0	1	1	0
22	38291464	-	1	1	0	1	1	0
22	38291474	-	1	1	0	1	1	1
22	38291605	-	1	0	0	1	1	1
22	38296292	-	1	1	0	1	1	0
22	38296560	-	1	1	0	1	0	1
22	38297672	-	1	1	0	0	0	0
22	38483672	-	1	1	0	1	1	0
22	38483940	-	1	0	0	1	1	0
22	38488081	-	1	0	0	1	1	1
22	38673247	+	1	1	0	1	1	0
22	38683994	+	1	1	0	0	0	0
22	38683996	+	1	1	0	1	1	1
22	38686028	-	1	1	0	1	1	0
22	38865199	-	1	0	0	1	0	0
22	39313694	-	1	0	0	1	0	0
22	39317515	-	1	0	0	1	1	0
22	39513676	+	1	1	0	1	1	0
22	39513988	+	1	1	0	1	1	1
22	39514123	+	1	1	0	1	1	1
22	39521931	+	1	1	0	0	0	0
22	39521933	+	1	1	0	1	1	1
22	39521952	+	1	0	0	0	0	0
22	39522130	+	1	0	0	0	0	0
22	39522411	+	1	0	0	0	0	0
22	39529238	-	1	0	0	1	0	0
22	39529292	-	1	1	0	1	0	1
22	40411440	-	1	1	0	0	0	0
22	40770617	-	1	1	0	1	0	0
22	40770673	-	1	1	0	1	1	1
22	40770754	-	1	1	0	1	1	1
22	41230418	+	1	1	0	1	0	0
22	41231193	+	1	1	0	1	1	0
22	41231231	+	1	0	0	0	0	0
22	41245732	-	1	0	0	0	1	1
22	41245764	-	1	0	0	1	1	1
22	41245932	-	1	1	0	1	1	1
22	41246035	-	1	0	0	1	1	1
22	41246507	-	1	1	0	1	1	1
22	41246512	-	1	0	0	1	0	0
22	41436905	-	1	0	0	1	1	1
22	41459978	-	1	0	0	1	0	1
22	41460045	-	1	1	0	1	1	1
22	41460239	-	1	0	0	0	0	0
22	41528981	-	1	0	0	0	1	1
22	41529027	-	1	0	0	1	0	1
22	41529038	-	1	1	0	1	0	0
22	41529047	-	1	1	0	1	1	1
22	41529053	-	1	0	0	1	0	0
22	41529173	-	1	1	0	1	1	1
22	41577169	-	1	1	0	1	0	1
22	41674091	-	1	1	0	1	0	1
22	41674282	-	1	1	0	1	0	1
22	42512431	-	1	0	0	0	0	0
22	42512639	-	1	1	0	0	1	0
22	42512746	-	1	1	0	1	0	1
22	42584399	-	1	1	0	0	0	0
22	42619287	-	1	1	0	1	1	1
22	43133042	-	1	1	0	1	1	1
22	43133064	-	1	1	0	0	1	1
22	43133070	-	1	1	0	1	0	0
22	43133232	-	1	1	0	0	0	0
22	43163009	+	1	1	0	1	1	1
22	43167804	-	1	1	0	1	1	1
22	43996487	+	1	0	0	1	0	0
22	44168792	+	1	1	0	1	0	0
22	44495706	-	1	0	0	0	0	0
22	44737042	+	1	0	0	1	1	0
22	46308687	+	1	1	0	0	0	0
22	49903534	-	1	1	0	1	0	0
22	49963196	+	1	1	0	1	1	1
22	49963294	+	1	1	0	1	0	1
22	49963322	+	1	0	0	0	0	0
22	49963323	+	1	1	0	0	0	0
22	49963324	+	1	1	0	0	0	0
22	50199313	+	1	1	0	0	0	0
22	50199315	+	1	0	0	1	1	1
22	50199346	+	1	1	0	1	1	0
22	50252986	-	1	0	0	1	0	0
22	50253264	-	1	1	0	1	0	1
22	50275548	-	1	0	0	0	0	0
22	50289796	-	1	0	0	1	0	1
22	50503189	-	1	1	0	1	1	0
22	50503318	-	1	1	0	1	1	0
22	50503323	-	1	1	0	1	1	1
22	50503472	-	1	1	0	1	1	1
22	50523755	-	1	1	0	1	1	1
22	50523850	-	1	1	0	1	1	1
22	50523852	-	1	1	0	0	0	0
22	50523853	-	1	1	0	0	0	0
22	50523863	-	1	1	0	1	1	1
22	50524031	-	1	1	0	1	0	1
22	50524058	-	1	1	0	1	1	1
22	50524201	-	1	1	0	1	1	1
22	50524275	-	1	1	0	1	1	0
22	50611239	+	1	0	0	0	0	0
11	204250	-	1	0	0	0	0	0
11	209925	+	1	1	0	1	1	1
11	214399	+	1	1	0	1	1	0
11	214536	+	1	1	0	1	1	1
11	214560	+	1	0	0	0	0	0
11	214595	+	1	1	0	0	0	0
11	237086	+	1	1	0	0	0	0
11	252725	+	1	1	0	0	0	0
11	252750	+	1	1	0	1	1	1
11	405865	-	1	0	0	1	0	0
11	491029	+	1	1	0	1	0	0
11	491231	+	1	1	0	0	1	0
11	494546	-	1	1	0	1	1	0
11	532358	-	1	1	0	0	0	0
11	644339	-	1	1	0	1	0	0
11	644418	-	1	1	0	1	0	0
11	825109	+	1	1	0	0	0	0
11	838420	+	1	1	0	1	0	1
11	1461481	+	1	0	0	1	1	0
11	1461483	+	1	1	0	0	0	0
11	1470132	-	1	1	0	1	0	0
11	1470366	-	1	0	0	1	1	0
11	2397096	+	1	0	0	1	0	0
11	2397181	+	1	0	0	0	0	0
11	2397183	+	1	1	0	1	1	0
11	2402730	+	1	1	0	0	1	1
11	2403219	+	1	1	0	1	1	0
11	2403790	+	1	1	0	1	1	0
11	3001078	-	1	1	0	1	1	0
11	3824129	+	1	1	0	1	0	0
11	3827046	-	1	1	0	1	1	0
11	3827050	-	1	0	0	0	0	0
11	3827315	-	1	1	0	0	0	0
11	3827355	-	1	0	0	1	1	1
11	3827562	-	1	0	0	1	0	0
11	3827785	-	1	1	0	1	0	0
11	3827968	-	1	0	0	1	1	1
11	3827977	-	1	1	0	1	1	1
11	4138483	+	1	0	0	1	1	0
11	6411201	-	1	1	0	1	1	0
11	6477039	-	1	1	0	0	0	0
11	6477041	-	1	1	0	1	1	0
11	6682181	-	1	1	0	1	0	0
11	7996068	+	1	1	0	0	0	0
11	9445553	+	1	1	0	1	0	0
11	18407397	+	1	1	0	1	1	0
11	32104473	+	1	1	0	0	0	0
11	32104494	+	1	1	0	0	0	0
11	32104638	+	1	1	0	1	0	0
11	33710237	-	1	1	0	1	1	1
11	35620404	+	1	0	0	1	1	1
11	35620521	+	1	0	0	0	0	0
11	43943692	+	1	0	0	0	0	0
11	44244805	+	1	1	0	0	0	0
11	46383489	+	1	0	0	0	0	0
11	46672486	+	1	1	0	1	0	1
11	46744052	-	1	0	0	1	0	0
11	47239371	-	1	0	0	0	0	0
11	47239521	-	1	1	0	0	0	0
11	47571605	+	1	1	0	1	1	1
11	47571620	+	1	0	0	0	0	0
11	47571621	+	1	0	0	0	0	0
11	57476750	+	1	0	0	1	0	1
11	57477310	+	1	1	0	0	0	0
11	57484888	-	1	0	0	1	0	0
11	57484946	-	1	1	0	0	1	0
11	57485077	-	1	0	0	1	0	0
11	57661162	+	1	0	0	0	0	0
11	57740894	+	1	1	0	1	0	0
11	59806462	-	1	1	0	1	1	1
11	59806522	-	1	1	0	1	0	1
11	59806761	-	1	0	0	1	0	0
11	60850443	+	1	1	0	1	0	1
11	60850502	+	1	1	0	1	1	1
11	60850605	+	1	1	0	0	0	0
11	60922966	+	1	1	0	1	0	1
11	61299970	-	1	1	0	1	0	0
11	61398403	+	1	0	0	0	0	0
11	61398405	+	1	0	0	0	0	0
11	61398478	+	1	0	0	1	1	0
11	61403471	-	1	1	0	1	0	1
11	61795896	+	1	1	0	1	1	1
11	61795898	+	1	0	0	0	0	0
11	61796022	+	1	0	0	0	0	0
11	61796058	+	1	0	0	1	1	1
11	61796103	+	1	1	0	1	0	1
11	61796229	+	1	1	0	1	1	1
11	61796465	+	1	0	0	0	0	0
11	61796466	+	1	1	0	0	0	0
11	61796468	+	1	1	0	0	1	0
11	61796891	+	1	1	0	1	0	1
11	61796895	+	1	1	0	0	0	0
11	61797040	+	1	1	0	0	1	1
11	61797153	+	1	1	0	0	0	0
11	61964745	-	1	0	0	0	1	0
11	61965106	-	1	0	0	0	0	0
11	62615446	-	1	1	0	1	1	0
11	62615649	-	1	0	0	1	0	0
11	62615659	-	1	0	0	1	0	0
11	62615661	-	1	0	0	0	0	0
11	62648090	-	1	1	0	1	1	0
11	62648534	-	1	1	0	1	0	0
11	62662985	-	1	1	0	1	1	0
11	62663008	-	1	0	0	0	0	0
11	62672281	+	1	1	0	1	1	1
11	62672285	+	1	1	0	1	1	0
11	62790689	-	1	0	0	1	1	1
11	62888446	+	1	1	0	1	0	1
11	62888501	+	1	0	0	0	0	0
11	62888502	+	1	0	0	1	1	1
11	62888709	+	1	1	0	1	0	1
11	62888782	+	1	0	0	0	0	0
11	63758386	+	1	1	0	1	1	0
11	63997521	+	1	1	0	1	1	0
11	64204270	+	1	1	0	1	1	1
11	64226915	+	1	0	0	0	0	0
11	64765735	-	1	0	0	0	0	0
11	64765818	-	1	0	0	0	0	0
11	64765914	-	1	1	0	1	0	1
11	64803766	-	1	0	0	1	0	0
11	64804322	-	1	1	0	1	0	1
11	64804605	-	1	1	0	0	0	1
11	64804664	-	1	0	0	1	1	0
11	64853882	-	1	1	0	1	1	0
11	64853995	-	1	1	0	1	0	1
11	65044524	+	1	1	0	1	1	1
11	65044554	+	1	0	0	1	0	1
11	65044704	+	1	1	0	1	1	1
11	65044758	+	1	1	0	1	1	0
11	65078973	-	1	1	0	1	0	0
11	65079626	-	1	1	0	1	1	0
11	65079728	-	1	1	0	1	1	1
11	65111429	+	1	1	0	1	1	1
11	65116576	-	1	0	0	0	0	0
11	65116614	-	1	1	0	1	1	1
11	65116707	-	1	1	0	1	0	1
11	65116709	-	1	1	0	0	0	0
11	65116937	-	1	1	0	1	0	1
11	65127927	-	1	1	0	0	0	0
11	65297424	+	1	1	0	1	1	0
11	65538561	+	1	1	0	1	1	0
11	65571526	+	1	1	0	1	1	1
11	65573708	+	1	1	0	0	0	0
11	65598333	-	1	0	0	1	1	0
11	65598411	-	1	0	0	1	0	1
11	65654415	-	1	0	0	0	0	0
11	65654417	-	1	1	0	1	1	1
11	65654437	-	1	0	0	0	0	0
11	65719219	+	1	1	0	1	1	1
11	65854973	-	1	0	0	0	1	0
11	65856060	-	1	0	0	0	0	0
11	65891036	+	1	1	0	1	1	1
11	65891089	+	1	1	0	1	0	1
11	65891456	+	1	1	0	1	0	1
11	65891567	+	1	1	0	1	1	1
11	65891588	+	1	1	0	1	1	0
11	65916945	-	1	0	0	1	1	0
11	65918110	-	1	1	0	1	0	1
11	66003693	+	1	0	0	0	0	0
11	66068830	+	1	1	0	1	0	0
11	66337362	-	1	1	0	1	0	0
11	66337483	-	1	0	0	1	0	1
11	66346857	-	1	1	0	0	0	0
11	66346859	-	1	1	0	1	0	1
11	66362969	-	1	1	0	1	1	1
11	66643490	+	1	1	0	1	1	1
11	66643588	+	1	1	0	0	0	0
11	66643776	+	1	0	0	0	0	0
11	66643856	+	1	0	0	0	0	0
11	66646144	+	1	0	0	1	0	0
11	66685673	-	1	0	0	0	0	0
11	66846365	+	1	1	0	1	1	0
11	67351748	-	1	1	0	1	1	0
11	68262746	-	1	1	0	1	0	1
11	70206693	+	1	0	0	1	1	1
11	70206985	+	1	0	0	0	0	1
11	71434630	-	1	1	0	0	0	0
11	71434637	-	1	1	0	0	1	1
11	71434835	-	1	1	0	0	0	0
11	71434837	-	1	1	0	1	1	1
11	71434843	-	1	0	0	1	1	1
11	71435080	-	1	1	0	1	0	0
11	71435151	-	1	0	0	0	0	0
11	71435261	-	1	1	0	0	1	1
11	71435429	-	1	1	0	1	1	1
11	71435726	-	1	1	0	1	0	1
11	71996357	+	1	0	0	1	1	0
11	72003315	-	1	1	0	1	1	0
11	72238595	+	1	0	0	1	1	0
11	73872803	-	1	0	0	1	0	0
11	73872965	-	1	1	0	0	0	0
11	73872967	-	1	1	0	1	1	1
11	73873229	-	1	1	0	1	1	0
11	75566530	+	1	1	0	1	0	1
11	75572130	+	1	0	0	0	0	0
11	75572132	+	1	1	0	1	1	1
11	75572134	+	1	1	0	0	0	0
11	75572267	+	1	0	0	1	1	0
11	75572269	+	1	0	0	0	0	0
11	75572608	+	1	1	0	0	0	0
11	75572650	+	1	0	0	0	0	0
11	77323144	-	1	0	0	0	0	0
11	82860095	-	1	1	0	0	0	0
11	85636199	+	1	1	0	0	1	0
11	93738341	-	1	0	0	1	1	0
11	95068109	+	1	0	0	1	1	0
11	95068464	+	1	0	0	0	0	0
11	95068465	+	1	0	0	0	0	0
11	95068948	+	1	0	0	0	0	0
11	106096854	+	1	1	0	0	1	0
11	112085261	-	1	1	0	1	1	0
11	118600855	+	1	0	0	1	1	1
11	118600891	+	1	0	0	1	1	0
11	119048493	-	1	1	0	0	0	0
11	119093906	-	1	1	0	1	1	0
11	119094132	-	1	1	0	0	0	0
11	119094134	-	1	1	0	0	1	1
11	119094187	-	1	1	0	1	1	1
11	119094203	-	1	1	0	1	1	1
11	119094526	-	1	1	0	1	0	1
11	119094528	-	1	0	0	0	0	0
11	119094860	-	1	1	0	1	1	1
11	119094862	-	1	1	0	0	0	0
11	119336557	+	1	1	0	1	1	0
11	119336572	+	1	1	0	1	1	0
11	119336671	+	1	0	0	0	0	0
11	119336673	+	1	1	0	0	1	0
11	119337050	+	1	1	0	1	0	0
11	119337193	+	1	1	0	0	0	0
11	123057680	-	1	1	0	1	1	1
11	123059518	-	1	0	0	1	1	0
11	123059648	-	1	0	0	1	1	0
11	123059680	-	1	0	0	1	1	1
11	123059835	-	1	1	0	0	0	0
11	123059837	-	1	1	0	1	1	1
11	125582417	+	1	1	0	0	0	0
11	125583961	+	1	1	0	1	1	1
11	126203287	-	1	1	0	0	0	0
11	126277897	+	1	1	0	1	1	0
11	126277969	+	1	1	0	1	0	1
11	129864664	-	1	1	0	1	0	1
11	129869605	-	1	0	0	0	0	0
11	129869606	-	1	0	0	0	0	0
11	130143570	+	1	1	0	1	1	1
17	442872	-	1	0	0	1	0	0
17	742736	+	1	1	0	0	0	0
17	744865	-	1	0	0	1	1	1
17	745290	-	1	1	0	1	0	1
17	745638	-	1	0	0	1	0	0
17	745925	-	1	1	0	1	1	0
17	746689	-	1	0	0	0	0	0
17	759940	-	1	1	0	1	1	1
17	791716	+	1	1	0	1	1	1
17	791839	+	1	1	0	1	1	1
17	792052	+	1	1	0	1	0	0
17	1001777	+	1	1	0	1	0	0
17	1004118	-	1	0	0	0	1	0
17	1345349	-	1	1	0	1	1	0
17	1897370	+	1	0	0	0	0	0
17	1897777	+	1	1	0	0	0	0
17	2042949	+	1	1	0	1	1	1
17	2042951	+	1	1	0	0	0	0
17	2043087	+	1	0	0	1	0	0
17	2043177	+	1	1	0	1	1	1
17	2043225	+	1	1	0	1	1	1
17	2043244	+	1	0	0	1	0	1
17	2043310	+	1	1	0	1	1	1
17	2690618	-	1	1	0	1	0	1
17	3660378	+	1	1	0	0	0	1
17	3663283	-	1	1	0	0	0	0
17	3663285	-	1	1	0	0	1	0
17	3669001	+	1	1	0	1	0	1
17	3669236	+	1	1	0	1	1	0
17	3669495	+	1	1	0	1	0	1
17	3669522	+	1	1	0	1	1	1
17	3669548	+	1	0	0	0	0	0
17	4539755	-	1	1	0	1	1	1
17	4937337	-	1	1	0	1	1	1
17	4937611	-	1	1	0	1	1	0
17	5022494	+	1	1	0	1	1	1
17	7014327	+	1	0	0	0	0	0
17	7014328	+	1	1	0	0	0	0
17	7014330	+	1	1	0	1	1	1
17	7014387	+	1	1	0	1	1	1
17	7014406	+	1	0	0	0	0	0
17	7014408	+	1	1	0	1	1	1
17	7017482	+	1	1	0	1	1	0
17	7236191	-	1	1	0	0	0	0
17	7236235	-	1	1	0	0	0	0
17	7236381	-	1	1	0	1	0	1
17	7243894	-	1	1	0	0	1	1
17	7244019	-	1	1	0	1	1	1
17	7563085	+	1	1	0	1	1	0
17	7578803	+	1	1	0	1	0	1
17	7587632	+	1	0	0	1	1	1
17	7587663	+	1	1	0	0	0	0
17	7587665	+	1	0	0	1	0	0
17	7626366	-	1	0	0	0	0	0
17	7626368	-	1	0	0	0	0	0
17	7626546	-	1	1	0	1	1	1
17	8189017	-	1	0	0	1	0	0
17	8189057	-	1	0	0	1	1	1
17	8189205	-	1	0	0	1	1	1
17	12992436	-	1	1	0	1	0	0
17	12992438	-	1	0	0	0	0	0
17	12992476	-	1	1	0	1	1	0
17	12992572	-	1	1	0	1	1	0
17	12992629	-	1	1	0	1	1	0
17	13496306	-	1	1	0	0	0	0
17	13496404	-	1	1	0	0	0	0
17	13496436	-	1	1	0	0	0	0
17	15975598	+	1	1	0	0	0	0
17	16349161	-	1	1	0	1	0	0
17	17185327	+	1	1	0	1	1	1
17	17491587	+	1	1	0	1	0	1
17	17492962	+	1	1	0	1	0	0
17	18107445	+	1	0	0	0	0	0
17	18107446	+	1	0	0	0	0	0
17	18185002	+	1	1	0	1	0	1
17	18209819	+	1	1	0	1	0	0
17	18265049	+	1	0	0	1	1	0
17	20999960	-	1	1	0	1	0	0
17	21002623	-	1	1	0	1	1	1
17	21002858	-	1	1	0	1	0	1
17	21191219	+	1	1	0	0	0	0
17	21191269	+	1	1	0	0	1	0
17	21198274	-	1	1	0	0	0	0
17	21198276	-	1	1	0	1	1	0
17	21198395	-	1	1	0	1	1	0
17	21198476	-	1	1	0	1	1	1
17	21198477	-	1	1	0	0	0	0
17	21198478	-	1	1	0	0	0	0
17	28326654	+	1	1	0	0	1	0
17	28326677	+	1	0	0	0	0	0
17	28347642	-	1	1	0	1	1	1
17	28553768	-	1	1	0	1	0	0
17	28553929	-	1	1	0	1	1	0
17	28554128	-	1	1	0	1	1	0
17	28554223	-	1	0	0	1	1	0
17	28554225	-	1	1	0	0	0	0
17	28648800	-	1	0	0	0	0	0
17	28724491	-	1	1	0	0	1	1
17	28724517	-	1	0	0	1	0	1
17	28724649	-	1	1	0	1	1	1
17	28749869	+	1	0	0	1	1	0
17	28860653	+	1	1	0	1	1	1
17	28906141	-	1	0	0	0	0	0
17	31852162	-	1	1	0	0	1	0
17	32369855	+	1	1	0	1	1	0
17	32369897	+	1	1	0	1	1	0
17	36495355	+	1	0	0	0	0	0
17	36495575	+	1	1	0	0	0	0
17	37512748	+	1	1	0	0	0	0
17	37512795	+	1	0	0	0	0	0
17	38322791	+	1	1	0	0	1	0
17	38323119	+	1	1	0	0	0	0
17	40129446	+	1	0	0	0	0	0
17	41690959	+	1	0	0	1	1	1
17	41802252	-	1	1	0	1	0	1
17	41802266	-	1	1	0	1	1	1
17	41811820	-	1	1	0	1	0	0
17	41822283	+	1	1	0	1	1	0
17	41822459	+	1	1	0	1	1	1
17	41822590	+	1	1	0	0	0	0
17	41822957	+	1	0	0	1	0	0
17	41825303	-	1	1	0	1	1	1
17	41825598	-	1	0	0	0	0	0
17	41825628	-	1	1	0	1	0	1
17	41867572	-	1	0	0	0	0	0
17	41968533	+	1	1	0	1	1	1
17	41968614	+	1	1	0	1	1	1
17	42113497	-	1	1	0	1	0	1
17	42113562	-	1	1	0	1	0	1
17	42543399	+	1	0	0	0	0	0
17	42543402	+	1	1	0	1	0	0
17	42543690	+	1	1	0	1	0	0
17	42562417	+	1	0	0	1	0	1
17	42566108	+	1	1	0	1	1	0
17	42571665	+	1	0	0	0	0	0
17	42571688	+	1	1	0	1	1	0
17	42615157	+	1	1	0	1	1	0
17	42779145	+	1	0	0	0	0	0
17	42779146	+	1	1	0	0	0	0
17	42779147	+	1	1	0	0	0	0
17	42779149	+	1	1	0	1	1	1
17	42779169	+	1	0	0	0	0	0
17	42779181	+	1	1	0	1	0	1
17	42779202	+	1	1	0	1	0	0
17	42797883	-	1	0	0	1	1	1
17	42797911	-	1	1	0	1	1	1
17	42797938	-	1	1	0	1	0	1
17	43200547	+	1	1	0	0	0	0
17	43769640	-	1	0	0	0	0	0
17	44011500	-	1	1	0	1	0	1
17	44075894	+	1	0	0	1	1	0
17	44148035	+	1	0	0	1	0	0
17	44190866	+	1	1	0	1	1	0
17	44191187	+	1	1	0	1	1	0
17	44206928	-	1	0	0	0	0	0
17	44206933	-	1	1	0	0	0	0
17	44206935	-	1	1	0	1	1	1
17	44207259	-	1	1	0	0	0	0
17	44319828	-	1	0	0	0	1	0
17	44319980	-	1	0	0	0	0	0
17	44353563	-	1	1	0	1	0	0
17	44354699	-	1	0	0	1	0	0
17	44558916	+	1	1	0	1	0	0
17	44559445	+	1	1	0	0	0	0
17	44850922	-	1	0	0	1	1	0
17	45107660	+	1	0	0	1	1	0
17	45150268	+	1	0	0	0	0	0
17	45150357	+	1	0	0	0	0	0
17	45169948	+	1	0	0	0	0	0
17	46978601	-	1	0	0	1	0	0
17	47824136	-	1	1	0	1	1	0
17	47824211	-	1	1	0	1	0	1
17	48543362	-	1	1	0	1	0	0
17	48543479	-	1	0	0	1	1	0
17	48596006	-	1	1	0	0	0	0
17	48607567	-	1	0	0	0	0	0
17	48621374	-	1	0	0	0	0	0
17	48621376	-	1	1	0	1	1	0
17	48621413	-	1	0	0	0	0	0
17	48621748	-	1	1	0	1	1	1
17	48621983	-	1	0	0	1	1	1
17	48621985	-	1	1	0	0	0	0
17	48622971	-	1	1	0	1	1	0
17	48622994	-	1	0	0	0	0	0
17	48623014	-	1	1	0	1	0	1
17	48625799	-	1	1	0	1	1	0
17	48625851	-	1	0	0	1	1	1
17	48927228	+	1	0	0	0	0	0
17	49404143	-	1	1	0	1	1	1
17	49599998	-	1	1	0	0	1	0
17	49600241	-	1	1	0	0	0	0
17	49600360	-	1	0	0	0	0	0
17	49600361	-	1	0	0	0	0	0
17	50367949	-	1	0	0	1	1	0
17	50367960	-	1	1	0	1	0	1
17	50368064	-	1	1	0	1	1	1
17	50368070	-	1	1	0	1	0	0
17	50368109	-	1	1	0	1	1	1
17	50368110	-	1	1	0	0	0	0
17	50368111	-	1	1	0	0	0	0
17	50368155	-	1	1	0	0	0	0
17	50368156	-	1	1	0	0	0	0
17	50381553	-	1	1	0	1	0	0
17	50382837	-	1	1	0	1	1	1
17	50382914	-	1	1	0	0	0	0
17	50382916	-	1	1	0	0	0	0
17	50382918	-	1	1	0	1	1	1
17	50485024	+	1	1	0	1	1	1
17	50485152	+	1	0	0	0	0	0
17	50485776	+	1	1	0	0	0	0
17	56950162	-	1	0	0	0	0	0
17	57106978	+	1	1	0	0	1	0
17	57107122	+	1	1	0	0	0	0
17	57120860	+	1	0	0	0	0	0
17	57839778	-	1	1	0	1	0	0
17	58345964	-	1	1	0	1	0	1
17	58346126	-	1	1	0	1	1	0
17	58346137	-	1	0	0	0	0	0
17	58346170	-	1	0	0	1	1	1
17	59213378	+	1	0	0	0	0	0
17	59213479	+	1	0	0	1	1	0
17	59697563	-	1	0	0	1	1	1
17	62426436	+	1	1	0	1	0	1
17	63608126	+	1	1	0	1	1	0
17	63608260	+	1	1	0	0	0	0
17	67743879	+	1	0	0	0	0	0
17	67743881	+	1	1	0	0	1	0
17	73285331	-	1	0	0	1	0	0
17	74771543	-	1	0	0	0	0	0
17	75021000	+	1	1	0	1	1	1
17	75021064	+	1	1	0	1	1	0
17	75130295	-	1	1	0	1	0	1
17	75236796	-	1	0	0	1	0	1
17	75266653	-	1	0	0	0	0	0
17	75266654	-	1	0	0	0	0	0
17	75266655	-	1	0	0	0	0	0
17	75273012	-	1	0	0	0	0	0
17	75273304	-	1	0	0	0	0	0
17	75273306	-	1	1	0	0	1	0
17	75273467	-	1	1	0	1	1	1
17	75524456	+	1	1	0	1	0	1
17	75524498	+	1	1	0	0	0	0
17	75524636	+	1	1	0	1	0	0
17	75524662	+	1	1	0	1	0	0
17	75706550	+	1	1	0	1	1	0
17	75706612	+	1	1	0	1	0	0
17	75778446	-	1	1	0	1	1	1
17	75846426	-	1	0	0	1	0	0
17	75898693	-	1	1	0	1	1	1
17	75898880	-	1	1	0	1	0	1
17	76000228	+	1	1	0	0	0	1
17	76000480	+	1	0	0	0	0	0
17	76039273	-	1	0	0	1	1	1
17	76039671	-	1	1	0	0	1	0
17	76081151	-	1	0	0	1	1	0
17	76081184	-	1	0	0	0	0	0
17	76270504	+	1	1	0	0	0	0
17	76270506	+	1	1	0	1	0	0
17	76270560	+	1	1	0	0	0	0
17	76270909	+	1	1	0	1	0	0
17	76270911	+	1	0	0	0	0	0
17	76311516	-	1	1	0	0	1	0
17	76389638	-	1	0	0	1	0	0
17	76390949	-	1	1	0	1	1	0
17	76391180	-	1	1	0	1	1	1
17	76391224	-	1	1	0	0	0	0
17	76391287	-	1	0	0	0	0	0
17	76733675	+	1	1	0	0	1	1
17	76734633	-	1	0	0	0	0	0
17	76735129	-	1	0	0	1	0	0
17	78171988	+	1	1	0	1	1	1
17	78172009	+	1	1	0	0	0	0
17	78172010	+	1	1	0	1	1	1
17	78172323	+	1	0	0	0	0	0
17	78172324	+	1	1	0	0	0	0
17	78172325	+	1	1	0	0	0	0
17	78174181	-	1	1	0	1	0	0
17	78224408	+	1	1	0	1	1	1
17	78224430	+	1	1	0	1	0	0
17	78224710	+	1	1	0	1	0	0
17	78797596	-	1	1	0	0	0	0
17	78803591	-	1	0	0	0	0	0
17	78803593	-	1	1	0	1	1	1
17	78992624	-	1	1	0	0	0	0
17	78992625	-	1	0	0	0	0	0
17	78993011	-	1	1	0	1	1	0
17	78993308	-	1	1	0	1	1	0
17	78997173	-	1	0	0	1	1	1
17	79794662	-	1	0	0	0	0	0
17	79794971	-	1	0	0	1	0	1
17	79795178	-	1	0	0	1	0	0
17	79833707	-	1	1	0	1	1	1
17	79833850	-	1	1	0	1	0	0
17	79834246	-	1	1	0	0	0	0
17	79835081	-	1	1	0	1	1	0
17	80146970	-	1	1	0	1	1	1
17	81241259	+	1	0	0	0	0	0
17	81241260	+	1	0	0	0	0	0
17	81241261	+	1	1	0	0	0	0
17	81510524	-	1	0	0	1	1	0
17	81510684	-	1	1	0	1	1	1
17	81511528	-	1	1	0	1	1	0
17	81511532	-	1	0	0	0	0	0
17	81557148	-	1	0	0	1	1	0
17	81558436	-	1	0	0	0	0	0
17	81558549	-	1	0	0	1	1	0
17	81558603	-	1	1	0	1	0	0
17	81558816	-	1	1	0	1	1	1
17	81559035	-	1	0	0	1	1	1
17	81559037	-	1	0	0	0	0	0
17	81559263	-	1	1	0	1	1	1
17	81665080	-	1	1	0	0	0	0
17	81665122	-	1	1	0	0	0	0
17	81665306	-	1	1	0	1	0	1
17	81665330	-	1	1	0	0	1	1
17	81665378	-	1	1	0	1	1	1
17	81665379	-	1	1	0	0	0	0
17	81665380	-	1	1	0	0	0	0
17	81665558	-	1	0	0	1	1	1
17	81666194	-	1	0	0	1	1	0
17	81666205	-	1	1	0	1	0	1
17	81681556	-	1	0	0	1	1	1
17	81707255	+	1	1	0	1	1	1
17	81707393	+	1	1	0	0	0	0
17	81707395	+	1	1	0	1	1	1
17	81720464	+	1	1	0	1	1	0
17	81822753	-	1	1	0	1	1	1
17	81823115	-	1	1	0	1	1	1
17	81843240	-	1	0	0	0	0	0
17	81843282	-	1	0	0	1	1	1
17	81843476	-	1	1	0	1	1	0
17	81843478	-	1	0	0	0	0	0
17	81843546	-	1	1	0	0	0	0
17	81843548	-	1	1	0	1	1	1
17	81843553	-	1	1	0	1	1	1
17	81843639	-	1	1	0	1	1	1
17	81843641	-	1	0	0	0	0	0
17	81843754	-	1	1	0	1	0	0
[truncated: 63,038 more rows]
