# Supplementary material for: Enhanced detection of RNA modifications and read mapping with high-accuracy nanopore RNA basecalling models
Source: HighWire-hosted journal article supplement (doi:10.1101/gr.278849.123), 2024-09-13
Supplement: Supplemental_Table_S5.xlsx [file Supplemental_Table_S5.xlsx]

## Sheet: Table S5
Table S5. Basecalling and mapping statistics
	Sample-ID	Sample Description	Replicate	basecalling model (short)	basecalling model (long)	guppy version	basecalled reads (fastq)	mapping software	mapping settings	reference file	uniquely mapped reads (-F 260)	% uniquely mapped
SYNTHETIC (curlcakes)	Curlcake_Unm_rep1_default	Curlcake_Unm	rep1	default	rna_r9.4.1_70bps_hac.cfg	6.0.6	846895	graphmap (v0.5.2)	--rebuild-index -v 1 --double-index --mapq -1 -x sensitive -z 1 -K fastq --min-read-len 0 -A 7 -k 5	curlcake_constructs_EcoRV_BamHI_digestion.fasta	679139	80.1916
	Curlcake_Unm_rep1_ivt			ivt	rna_r9.4.1_70bps_ivt_hac.cfg	6.0.6		graphmap (v0.5.2)	--rebuild-index -v 1 --double-index --mapq -1 -x sensitive -z 1 -K fastq --min-read-len 0 -A 7 -k 5	curlcake_constructs_EcoRV_BamHI_digestion.fasta	672093	79.3597
	Curlcake_Unm_rep1_sup			sup	rna_r9.4.1_70bps_sup.cfg	6.0.6		graphmap (v0.5.2)	--rebuild-index -v 1 --double-index --mapq -1 -x sensitive -z 1 -K fastq --min-read-len 0 -A 7 -k 5	curlcake_constructs_EcoRV_BamHI_digestion.fasta	682348	80.5706
	Curlcake_m6A_rep1_default	Curlcake_m6A	rep1	default	rna_r9.4.1_70bps_hac.cfg	6.0.6	639088	graphmap (v0.5.2)	--rebuild-index -v 1 --double-index --mapq -1 -x sensitive -z 1 -K fastq --min-read-len 0 -A 7 -k 5	curlcake_constructs_EcoRV_BamHI_digestion.fasta	473635	74.1111
	Curlcake_m6A_rep1_ivt			ivt	rna_r9.4.1_70bps_ivt_hac.cfg	6.0.6		graphmap (v0.5.2)	--rebuild-index -v 1 --double-index --mapq -1 -x sensitive -z 1 -K fastq --min-read-len 0 -A 7 -k 5	curlcake_constructs_EcoRV_BamHI_digestion.fasta	434227	67.9448
	Curlcake_m6A_rep1_sup			sup	rna_r9.4.1_70bps_sup.cfg	6.0.6		graphmap (v0.5.2)	--rebuild-index -v 1 --double-index --mapq -1 -x sensitive -z 1 -K fastq --min-read-len 0 -A 7 -k 5	curlcake_constructs_EcoRV_BamHI_digestion.fasta	471573	73.7884
	Curlcake_pU_rep1_default	Curlcake_pU	rep1	default	rna_r9.4.1_70bps_hac.cfg	6.0.6	42386	graphmap (v0.5.2)	--rebuild-index -v 1 --double-index --mapq -1 -x sensitive -z 1 -K fastq --min-read-len 0 -A 7 -k 5	curlcake_constructs_EcoRV_BamHI_digestion.fasta	16669	39.3267
	Curlcake_pU_rep1_ivt			ivt	rna_r9.4.1_70bps_ivt_hac.cfg	6.0.6		graphmap (v0.5.2)	--rebuild-index -v 1 --double-index --mapq -1 -x sensitive -z 1 -K fastq --min-read-len 0 -A 7 -k 5	curlcake_constructs_EcoRV_BamHI_digestion.fasta	13982	32.9873
	Curlcake_pU_rep1_sup			sup	rna_r9.4.1_70bps_sup.cfg	6.0.6		graphmap (v0.5.2)	--rebuild-index -v 1 --double-index --mapq -1 -x sensitive -z 1 -K fastq --min-read-len 0 -A 7 -k 5	curlcake_constructs_EcoRV_BamHI_digestion.fasta	18353	43.2997
	Curlcake_m5C_rep1_default	Curlcake_m5C	rep1	default	rna_r9.4.1_70bps_hac.cfg	6.0.6	415453	graphmap (v0.5.2)	--rebuild-index -v 1 --double-index --mapq -1 -x sensitive -z 1 -K fastq --min-read-len 0 -A 7 -k 5	curlcake_constructs_EcoRV_BamHI_digestion.fasta	320080	77.0436
	Curlcake_m5C_rep1_ivt			ivt	rna_r9.4.1_70bps_ivt_hac.cfg	6.0.6		graphmap (v0.5.2)	--rebuild-index -v 1 --double-index --mapq -1 -x sensitive -z 1 -K fastq --min-read-len 0 -A 7 -k 5	curlcake_constructs_EcoRV_BamHI_digestion.fasta	305551	73.5465
	Curlcake_m5C_rep1_sup			sup	rna_r9.4.1_70bps_sup.cfg	6.0.6		graphmap (v0.5.2)	--rebuild-index -v 1 --double-index --mapq -1 -x sensitive -z 1 -K fastq --min-read-len 0 -A 7 -k 5	curlcake_constructs_EcoRV_BamHI_digestion.fasta	329863	79.3984
	Curlcake_5hmC_rep1_default	Curlcake_5hmC	rep1	default	rna_r9.4.1_70bps_hac.cfg	6.0.6	111015	graphmap (v0.5.2)	--rebuild-index -v 1 --double-index --mapq -1 -x sensitive -z 1 -K fastq --min-read-len 0 -A 7 -k 5	curlcake_constructs_EcoRV_BamHI_digestion.fasta	80856	72.8334
	Curlcake_5hmC_rep1_ivt			ivt	rna_r9.4.1_70bps_ivt_hac.cfg	6.0.6		graphmap (v0.5.2)	--rebuild-index -v 1 --double-index --mapq -1 -x sensitive -z 1 -K fastq --min-read-len 0 -A 7 -k 5	curlcake_constructs_EcoRV_BamHI_digestion.fasta	79201	71.3426
	Curlcake_5hmC_rep1_sup			sup	rna_r9.4.1_70bps_sup.cfg	6.0.6		graphmap (v0.5.2)	--rebuild-index -v 1 --double-index --mapq -1 -x sensitive -z 1 -K fastq --min-read-len 0 -A 7 -k 5	curlcake_constructs_EcoRV_BamHI_digestion.fasta	86112	77.5679
	Curlcake_m5U_rep1_default	Curlcake_m5U	rep1	default	rna_r9.4.1_70bps_hac.cfg	6.0.6	24617	graphmap (v0.5.2)	--rebuild-index -v 1 --double-index --mapq -1 -x sensitive -z 1 -K fastq --min-read-len 0 -A 7 -k 5	curlcake_constructs_EcoRV_BamHI_digestion.fasta	20696	84.072
	Curlcake_m5U_rep1_ivt			ivt	rna_r9.4.1_70bps_ivt_hac.cfg	6.0.6		graphmap (v0.5.2)	--rebuild-index -v 1 --double-index --mapq -1 -x sensitive -z 1 -K fastq --min-read-len 0 -A 7 -k 5	curlcake_constructs_EcoRV_BamHI_digestion.fasta	19853	80.6475
	Curlcake_m5U_rep1_sup			sup	rna_r9.4.1_70bps_sup.cfg	6.0.6		graphmap (v0.5.2)	--rebuild-index -v 1 --double-index --mapq -1 -x sensitive -z 1 -K fastq --min-read-len 0 -A 7 -k 5	curlcake_constructs_EcoRV_BamHI_digestion.fasta	21150	85.9162
	Curlcake_ac4C_rep1_default	Curlcake_ac4C	rep1	default	rna_r9.4.1_70bps_hac.cfg	6.0.6	776867	graphmap (v0.5.2)	--rebuild-index -v 1 --double-index --mapq -1 -x sensitive -z 1 -K fastq --min-read-len 0 -A 7 -k 5	curlcake_constructs_EcoRV_BamHI_digestion.fasta	622729	80.159
	Curlcake_ac4C_rep1_ivt			ivt	rna_r9.4.1_70bps_ivt_hac.cfg	6.0.6		graphmap (v0.5.2)	--rebuild-index -v 1 --double-index --mapq -1 -x sensitive -z 1 -K fastq --min-read-len 0 -A 7 -k 5	curlcake_constructs_EcoRV_BamHI_digestion.fasta	595864	76.7009
	Curlcake_ac4C_rep1_sup			sup	rna_r9.4.1_70bps_sup.cfg	6.0.6		graphmap (v0.5.2)	--rebuild-index -v 1 --double-index --mapq -1 -x sensitive -z 1 -K fastq --min-read-len 0 -A 7 -k 5	curlcake_constructs_EcoRV_BamHI_digestion.fasta	630145	81.1136
	Curlcake_m1Y_rep1_default	Curlcake_m1Y	rep1	default	rna_r9.4.1_70bps_hac.cfg	6.0.6	206914	graphmap (v0.5.2)	--rebuild-index -v 1 --double-index --mapq -1 -x sensitive -z 1 -K fastq --min-read-len 0 -A 7 -k 5	curlcake_constructs_EcoRV_BamHI_digestion.fasta	185507	89.6542
	Curlcake_m1Y_rep1_ivt			ivt	rna_r9.4.1_70bps_ivt_hac.cfg	6.0.6		graphmap (v0.5.2)	--rebuild-index -v 1 --double-index --mapq -1 -x sensitive -z 1 -K fastq --min-read-len 0 -A 7 -k 5	curlcake_constructs_EcoRV_BamHI_digestion.fasta	178789	86.4074
	Curlcake_m1Y_rep1_sup			sup	rna_r9.4.1_70bps_sup.cfg	6.0.6		graphmap (v0.5.2)	--rebuild-index -v 1 --double-index --mapq -1 -x sensitive -z 1 -K fastq --min-read-len 0 -A 7 -k 5	curlcake_constructs_EcoRV_BamHI_digestion.fasta	187608	90.6696
	Curlcake_m6A_stoich_rep1_default	Curlcake_m6A_stoich	rep1	default	rna_r9.4.1_70bps_hac.cfg	6.0.6	235880	graphmap (v0.5.2)	--rebuild-index -v 1 --double-index --mapq -1 -x sensitive -z 1 -K fastq --min-read-len 0 -A 7 -k 5	curlcake_constructs_EcoRV_BamHI_digestion.fasta	220459	93.4624
	Curlcake_m6A_stoich_rep1_ivt			ivt	rna_r9.4.1_70bps_ivt_hac.cfg	6.0.6		graphmap (v0.5.2)	--rebuild-index -v 1 --double-index --mapq -1 -x sensitive -z 1 -K fastq --min-read-len 0 -A 7 -k 5	curlcake_constructs_EcoRV_BamHI_digestion.fasta	215143	91.2087
	Curlcake_m6A_stoich_rep1_sup			sup	rna_r9.4.1_70bps_sup.cfg	6.0.6		graphmap (v0.5.2)	--rebuild-index -v 1 --double-index --mapq -1 -x sensitive -z 1 -K fastq --min-read-len 0 -A 7 -k 5	curlcake_constructs_EcoRV_BamHI_digestion.fasta	224675	95.2497
IN VIVO (m6A analysis)	HEK293T_WT_rep1_default	HEK293T_WT	rep1	default	rna_r9.4.1_70bps_hac.cfg	6.0.6	1040661	minimap2 (v2.17)	-uf -ax splice -k14	Homo_sapiens.GRCh38.dna_sm.primary_assembly.fa	986750	94.8195
	HEK293T_WT_rep1_ivt			ivt	rna_r9.4.1_70bps_ivt_hac.cfg	6.0.6		minimap2 (v2.17)	-uf -ax splice -k14	Homo_sapiens.GRCh38.dna_sm.primary_assembly.fa	957956	92.0526
	HEK293T_WT_rep1_sup			sup	rna_r9.4.1_70bps_sup.cfg	6.0.6		minimap2 (v2.17)	-uf -ax splice -k14	Homo_sapiens.GRCh38.dna_sm.primary_assembly.fa	1000634	96.1537
	HEK293T_WT_rep2_default	HEK293T_WT	rep2	default	rna_r9.4.1_70bps_hac.cfg	6.0.6	1380000	minimap2 (v2.17)	-uf -ax splice -k14	Homo_sapiens.GRCh38.dna_sm.primary_assembly.fa	1273471	92.2805
	HEK293T_WT_rep2_ivt			ivt	rna_r9.4.1_70bps_ivt_hac.cfg	6.0.6		minimap2 (v2.17)	-uf -ax splice -k14	Homo_sapiens.GRCh38.dna_sm.primary_assembly.fa	1228868	89.0484
	HEK293T_WT_rep2_sup			sup	rna_r9.4.1_70bps_sup.cfg	6.0.6		minimap2 (v2.17)	-uf -ax splice -k14	Homo_sapiens.GRCh38.dna_sm.primary_assembly.fa	1301004	94.2757
	HEK293T_WT_rep3_default	HEK293T_WT	rep3	default	rna_r9.4.1_70bps_hac.cfg	6.0.6	513668	minimap2 (v2.17)	-uf -ax splice -k14	Homo_sapiens.GRCh38.dna_sm.primary_assembly.fa	463205	90.176
	HEK293T_WT_rep3_ivt			ivt	rna_r9.4.1_70bps_ivt_hac.cfg	6.0.6		minimap2 (v2.17)	-uf -ax splice -k14	Homo_sapiens.GRCh38.dna_sm.primary_assembly.fa	421983	82.1509
	HEK293T_WT_rep3_sup			sup	rna_r9.4.1_70bps_sup.cfg	6.0.6		minimap2 (v2.17)	-uf -ax splice -k14	Homo_sapiens.GRCh38.dna_sm.primary_assembly.fa	475638	92.5964
	HEK293T_Mettl3_KO_rep1_default	HEK293T_Mettl3_KO	rep1	default	rna_r9.4.1_70bps_hac.cfg	6.0.6	1482210	minimap2 (v2.17)	-uf -ax splice -k14	Homo_sapiens.GRCh38.dna_sm.primary_assembly.fa	1407612	94.9671
	HEK293T_Mettl3_KO_rep1_ivt			ivt	rna_r9.4.1_70bps_ivt_hac.cfg	6.0.6		minimap2 (v2.17)	-uf -ax splice -k14	Homo_sapiens.GRCh38.dna_sm.primary_assembly.fa	1366339	92.1826
	HEK293T_Mettl3_KO_rep1_sup			sup	rna_r9.4.1_70bps_sup.cfg	6.0.6		minimap2 (v2.17)	-uf -ax splice -k14	Homo_sapiens.GRCh38.dna_sm.primary_assembly.fa	1428865	96.401
	HEK293T_Mettl3_KO_rep2_default	HEK293T_Mettl3_KO	rep2	default	rna_r9.4.1_70bps_hac.cfg	6.0.6	1783589	minimap2 (v2.17)	-uf -ax splice -k14	Homo_sapiens.GRCh38.dna_sm.primary_assembly.fa	1665581	93.3837
	HEK293T_Mettl3_KO_rep2_ivt			ivt	rna_r9.4.1_70bps_ivt_hac.cfg	6.0.6		minimap2 (v2.17)	-uf -ax splice -k14	Homo_sapiens.GRCh38.dna_sm.primary_assembly.fa	1605860	90.0353
	HEK293T_Mettl3_KO_rep2_sup			sup	rna_r9.4.1_70bps_sup.cfg	6.0.6		minimap2 (v2.17)	-uf -ax splice -k14	Homo_sapiens.GRCh38.dna_sm.primary_assembly.fa	1692722	94.9054
	HEK293T_Mettl3_KO_rep3_default	HEK293T_Mettl3_KO	rep3	default	rna_r9.4.1_70bps_hac.cfg	6.0.6	1645075	minimap2 (v2.17)	-uf -ax splice -k14	Homo_sapiens.GRCh38.dna_sm.primary_assembly.fa	1552161	94.352
	HEK293T_Mettl3_KO_rep3_ivt			ivt	rna_r9.4.1_70bps_ivt_hac.cfg	6.0.6		minimap2 (v2.17)	-uf -ax splice -k14	Homo_sapiens.GRCh38.dna_sm.primary_assembly.fa	1498124	91.0672
	HEK293T_Mettl3_KO_rep3_sup			sup	rna_r9.4.1_70bps_sup.cfg	6.0.6		minimap2 (v2.17)	-uf -ax splice -k14	Homo_sapiens.GRCh38.dna_sm.primary_assembly.fa	1577038	95.8642
IN VIVO (cross-species analysis)	HEK293T_WT_rep1_default	HEK293T_WT	rep1	default	rna_r9.4.1_70bps_hac.cfg	6.0.6	1040661	minimap2 (v2.17)	-ax map-ont -k14	Homo_sapiens.GRCh38.cdna.all.fa	983949	94.5504
	HEK293T_WT_rep1_ivt			ivt	rna_r9.4.1_70bps_ivt_hac.cfg	6.0.6		minimap2 (v2.17)	-ax map-ont -k14	Homo_sapiens.GRCh38.cdna.all.fa	953901	91.663
	HEK293T_WT_rep1_sup			sup	rna_r9.4.1_70bps_sup.cfg	6.0.6		minimap2 (v2.17)	-ax map-ont -k14	Homo_sapiens.GRCh38.cdna.all.fa	999615	96.0558
	HEK293T_WT_rep2_default	HEK293T_WT	rep2	default	rna_r9.4.1_70bps_hac.cfg	6.0.6	1380000	minimap2 (v2.17)	-ax map-ont -k14	Homo_sapiens.GRCh38.cdna.all.fa	1263006	91.5222
	HEK293T_WT_rep2_ivt			ivt	rna_r9.4.1_70bps_ivt_hac.cfg	6.0.6		minimap2 (v2.17)	-ax map-ont -k14	Homo_sapiens.GRCh38.cdna.all.fa	1213097	87.9056
	HEK293T_WT_rep2_sup			sup	rna_r9.4.1_70bps_sup.cfg	6.0.6		minimap2 (v2.17)	-ax map-ont -k14	Homo_sapiens.GRCh38.cdna.all.fa	1297606	94.0294
	HEK293T_WT_rep3_default	HEK293T_WT	rep3	default	rna_r9.4.1_70bps_hac.cfg	6.0.6	513668	minimap2 (v2.17)	-ax map-ont -k14	Homo_sapiens.GRCh38.cdna.all.fa	456730	88.9154
	HEK293T_WT_rep3_ivt			ivt	rna_r9.4.1_70bps_ivt_hac.cfg	6.0.6		minimap2 (v2.17)	-ax map-ont -k14	Homo_sapiens.GRCh38.cdna.all.fa	415910	80.9686
	HEK293T_WT_rep3_sup			sup	rna_r9.4.1_70bps_sup.cfg	6.0.6		minimap2 (v2.17)	-ax map-ont -k14	Homo_sapiens.GRCh38.cdna.all.fa	472123	91.9121
	m.musculus_rep1_default	m.musculus	rep1	default	rna_r9.4.1_70bps_hac.cfg	6.0.6	1383267	minimap2 (v2.17)	-ax map-ont -k14	Mus_musculus.GRCm39.cdna.all.fa	1230659	88.9676
	m.musculus_rep1_ivt			ivt	rna_r9.4.1_70bps_ivt_hac.cfg	6.0.6		minimap2 (v2.17)	-ax map-ont -k14	Mus_musculus.GRCm39.cdna.all.fa	1151001	83.2089
	m.musculus_rep1_sup			sup	rna_r9.4.1_70bps_sup.cfg	6.0.6		minimap2 (v2.17)	-ax map-ont -k14	Mus_musculus.GRCm39.cdna.all.fa	1281361	92.6329
	x.laevis_rep1_default	x.laevis	rep1	default	rna_r9.4.1_70bps_hac.cfg	6.0.6	1774114	minimap2 (v2.17)	-ax map-ont -k14	xlaevisMRNA.fasta	1134109	63.9254
	x.laevis_rep1_ivt			ivt	rna_r9.4.1_70bps_ivt_hac.cfg	6.0.6		minimap2 (v2.17)	-ax map-ont -k14	xlaevisMRNA.fasta	986465	55.6032
	x.laevis_rep1_sup			sup	rna_r9.4.1_70bps_sup.cfg	6.0.6		minimap2 (v2.17)	-ax map-ont -k14	xlaevisMRNA.fasta	1281919	72.2569
	s.cerevisiae_rep1_default	s.cerevisiae	rep1	default	rna_r9.4.1_70bps_hac.cfg	6.0.6	1197462	minimap2 (v2.17)	-ax map-ont -k14	Saccharomyces_cerevisiae.R64-1-1.cdna.all.fa	460897	38.4895
	s.cerevisiae_rep1_ivt			ivt	rna_r9.4.1_70bps_ivt_hac.cfg	6.0.6		minimap2 (v2.17)	-ax map-ont -k14	Saccharomyces_cerevisiae.R64-1-1.cdna.all.fa	379276	31.6733
	s.cerevisiae_rep1_sup			sup	rna_r9.4.1_70bps_sup.cfg	6.0.6		minimap2 (v2.17)	-ax map-ont -k14	Saccharomyces_cerevisiae.R64-1-1.cdna.all.fa	505138	42.1841
	a.thaliana_rep1_default	a.thaliana	rep1	default	rna_r9.4.1_70bps_hac.cfg	6.0.6	1586916	minimap2 (v2.17)	-ax map-ont -k14	Arabidopsis_thaliana.TAIR10.cdna.all.fa	982784	61.9304
	a.thaliana_rep1_ivt			ivt	rna_r9.4.1_70bps_ivt_hac.cfg	6.0.6		minimap2 (v2.17)	-ax map-ont -k14	Arabidopsis_thaliana.TAIR10.cdna.all.fa	928428	58.5052
	a.thaliana_rep1_sup			sup	rna_r9.4.1_70bps_sup.cfg	6.0.6		minimap2 (v2.17)	-ax map-ont -k14	Arabidopsis_thaliana.TAIR10.cdna.all.fa	1006339	63.4148
SYNTHETIC (mapping analysis)	UNM-S_rep1_default	UNM-S	rep1	default	rna_r9.4.1_70bps_hac.cfg	6.0.6	77629	minimap2 (v2.17)	-ax map-ont -k14	riboswitches.fa	45902	59.13
	UNM-S_rep1_ivt			ivt	rna_r9.4.1_70bps_ivt_hac.cfg	6.0.6		minimap2 (v2.17)	-ax map-ont -k14	riboswitches.fa	32118	41.3737
	UNM-S_rep1_sup			sup	rna_r9.4.1_70bps_sup.cfg	6.0.6		minimap2 (v2.17)	-ax map-ont -k14	riboswitches.fa	53701	69.1765
	UNM-S_rep2_default	UNM-S	rep2	default	rna_r9.4.1_70bps_hac.cfg	6.0.6	356523	minimap2 (v2.17)	-ax map-ont -k14	riboswitches.fa	164813	46.2279
	UNM-S_rep2_ivt			ivt	rna_r9.4.1_70bps_ivt_hac.cfg	6.0.6		minimap2 (v2.17)	-ax map-ont -k14	riboswitches.fa	102639	28.7889
	UNM-S_rep2_sup			sup	rna_r9.4.1_70bps_sup.cfg	6.0.6		minimap2 (v2.17)	-ax map-ont -k14	riboswitches.fa	246656	69.1838
	UNM-S_rep3_default	UNM-S	rep3	default	rna_r9.4.1_70bps_hac.cfg	6.0.6	139751	minimap2 (v2.17)	-ax map-ont -k14	riboswitches.fa	67619	48.3853
	UNM-S_rep3_ivt			ivt	rna_r9.4.1_70bps_ivt_hac.cfg	6.0.6		minimap2 (v2.17)	-ax map-ont -k14	riboswitches.fa	56673	40.5528
	UNM-S_rep3_sup			sup	rna_r9.4.1_70bps_sup.cfg	6.0.6		minimap2 (v2.17)	-ax map-ont -k14	riboswitches.fa	96012	68.7022
SYNTHETIC (eGFP vaccine)	eGFP_vaccine_U_rep1_default	eGFP_vaccine_U	rep1	default	rna_r9.4.1_70bps_hac.cfg	6.0.6	2679028	graphmap (v0.5.2)	--rebuild-index -v 1 --double-index --mapq -1 -x sensitive -z 1 -K fastq --min-read-len 0 -A 7 -k 5	2021-8_eGFP_mRNA.v2.fa	2610587	0.974453
	eGFP_vaccine_U_rep1_sup			sup	rna_r9.4.1_70bps_sup.cfg	6.0.6		graphmap (v0.5.2)	--rebuild-index -v 1 --double-index --mapq -1 -x sensitive -z 1 -K fastq --min-read-len 0 -A 7 -k 5	2021-8_eGFP_mRNA.v2.fa	2637225	0.984396
	eGFP_vaccine_m1Y_rep1_default	eGFP_vaccine_m1Ψ	rep2	default	rna_r9.4.1_70bps_hac.cfg	6.0.6	707587	graphmap (v0.5.2)	--rebuild-index -v 1 --double-index --mapq -1 -x sensitive -z 1 -K fastq --min-read-len 0 -A 7 -k 5	2021-8_eGFP_mRNA.v2.fa	669013	0.945485
	eGFP_vaccine_m1Y_rep1_sup			sup	rna_r9.4.1_70bps_sup.cfg	6.0.6		graphmap (v0.5.2)	--rebuild-index -v 1 --double-index --mapq -1 -x sensitive -z 1 -K fastq --min-read-len 0 -A 7 -k 5	2021-8_eGFP_mRNA.v2.fa	672913	0.950997
